# Supplementary material
Source: PubMed Central journal article supplement (PMC6775990)
Supplement: 41396_2019_461_MOESM2_ESM.pdf [file 41396_2019_461_MOESM2_ESM.pdf]

**Supplementary Table 1. Background information of 1,103 strains used in this research.**

| <b>Strain ID</b> | <b>Year</b> | <b>Region</b> | <b>Sample type</b> | <b>Source</b> | <b>Population</b> | <b>Clonal Groups</b> | <b>Accession</b> | <b>Reference</b> |
|------------------|-------------|---------------|--------------------|---------------|-------------------|----------------------|------------------|------------------|
| A1_1             | 2014        | China: Henan  | Environmental      | Fish          | VppAsia           |                      | NNRH00000000     | This work        |
| A1_2             | 2014        | China: Henan  | Environmental      | Fish          | VppAsia           |                      | NNRG00000000     | This work        |
| A1_3             | 2014        | China: Henan  | Environmental      | Fish          | VppAsia           |                      | NNRF00000000     | This work        |
| A1_4             | 2014        | China: Henan  | Environmental      | Water         | VppAsia           |                      | NNRE00000000     | This work        |
| A1_6             | 2014        | China: Henan  | Environmental      | Fish          | VppAsia           |                      | NNRD00000000     | This work        |
| A1_7             | 2014        | China: Henan  | Environmental      | Fish          | VppX              |                      | NNRC00000000     | This work        |
| A1_8             | 2014        | China: Henan  | Environmental      | Fish          | VppX              |                      | NNRB00000000     | This work        |
| A1_9             | 2014        | China: Henan  | Environmental      | Water         | VppAsia           |                      | NNRA00000000     | This work        |
| A2_1             | 2014        | China: Henan  | Environmental      | Fish          | VppAsia           |                      | NNQZ00000000     | This work        |
| A2_2             | 2014        | China: Henan  | Environmental      | Fish          | VppX              |                      | NNQY00000000     | This work        |
| A2_3             | 2014        | China: Henan  | Environmental      | Fish          | VppAsia           |                      | NNQX00000000     | This work        |
| A2_4             | 2014        | China: Henan  | Environmental      | Fish          | VppAsia           |                      | NNQW00000000     | This work        |
| A2_5             | 2014        | China: Henan  | Environmental      | Fish          | VppAsia           |                      | NNQV00000000     | This work        |
| A2_6             | 2014        | China: Henan  | Environmental      | Fish          | VppAsia           |                      | NNQU00000000     | This work        |
| A2_7             | 2014        | China: Henan  | Environmental      | Water         | VppAsia           |                      | NNQT00000000     | This work        |
| A2_8             | 2014        | China: Henan  | Environmental      | Fish          | VppAsia           |                      | NNQS00000000     | This work        |
| A2_9             | 2014        | China: Henan  | Environmental      | Fish          | VppX              |                      | NNQR00000000     | This work        |
| A3_2             | 2014        | China: Henan  | Environmental      | Fish          | VppAsia           |                      | NNQQ00000000     | This work        |
| A3_3             | 2014        | China: Henan  | Environmental      | Fish          | VppAsia           |                      | NNQP00000000     | This work        |
| A3_4             | 2014        | China: Henan  | Environmental      | Fish          | VppAsia           |                      | NNQO00000000     | This work        |
| A3_5             | 2014        | China: Henan  | Environmental      | Water         | VppX              |                      | NNQN00000000     | This work        |
| A3_6             | 2014        | China: Henan  | Environmental      | Fish          | VppAsia           |                      | NNQM00000000     | This work        |
| A3_7             | 2014        | China: Henan  | Environmental      | Fish          | VppAsia           |                      | NNQL00000000     | This work        |
| A3_8             | 2014        | China: Henan  | Environmental      | Fish          | VppAsia           |                      | NNQK00000000     | This work        |
| A3_9             | 2014        | China: Henan  | Environmental      | Fish          | VppAsia           |                      | NNQJ00000000     | This work        |
| A4_1             | 2014        | China: Henan  | Environmental      | Fish          | VppAsia           |                      | NNQI00000000     | This work        |
| A4_2             | 2014        | China: Henan  | Environmental      | Fish          | VppAsia           |                      | NNQH00000000     | This work        |
| A4_3             | 2014        | China: Henan  | Environmental      | Fish          | VppAsia           |                      | NNQG00000000     | This work        |
| A4_4             | 2014        | China: Henan  | Environmental      | Fish          | VppAsia           |                      | NNQF00000000     | This work        |
| A4_5             | 2014        | China: Henan  | Environmental      | Fish          | VppAsia           |                      | NNQE00000000     | This work        |

|       |      |              |               |           |         |     |              |           |
|-------|------|--------------|---------------|-----------|---------|-----|--------------|-----------|
| A4_6  | 2014 | China: Henan | Environmental | Fish      | VppAsia |     | NNQD00000000 | This work |
| A4_9  | 2014 | China: Henan | Environmental | Water     | VppAsia |     | NNQC00000000 | This work |
| A5_1  | 2014 | China: Henan | Environmental | Fish      | VppAsia |     | NNQB00000000 | This work |
| A5_3  | 2014 | China: Henan | Environmental | Water     | VppAsia |     | NNQA00000000 | This work |
| A5_4  | 2014 | China: Henan | Environmental | Fish      | VppAsia |     | NNPZ00000000 | This work |
| A5_7  | 2014 | China: Henan | Environmental | Fish      | VppAsia |     | NNPY00000000 | This work |
| A5_8  | 2014 | China: Henan | Environmental | Fish      | VppAsia |     | NNPX00000000 | This work |
| B1_1  | 2014 | China: Hubei | Environmental | Fish      | VppAsia |     | NNPW00000000 | This work |
| B1_10 | 2014 | China: Hubei | Environmental | Fish      | VppAsia |     | NNPV00000000 | This work |
| B1_3  | 2014 | China: Hubei | Environmental | Fish      | VppAsia |     | NNPU00000000 | This work |
| B1_4  | 2014 | China: Hubei | Environmental | Fish      | VppAsia | CG7 | NNPT00000000 | This work |
| B1_5  | 2014 | China: Hubei | Environmental | Fish      | VppAsia | CG7 | NNPS00000000 | This work |
| B1_6  | 2014 | China: Hubei | Environmental | Fish      | VppX    |     | NNPR00000000 | This work |
| B1_7  | 2014 | China: Hubei | Environmental | Fish      | VppAsia |     | NNPQ00000000 | This work |
| B1_8  | 2014 | China: Hubei | Environmental | Fish      | VppAsia |     | NNPP00000000 | This work |
| B1_9  | 2014 | China: Hubei | Environmental | Fish      | VppAsia | CG7 | NNPO00000000 | This work |
| B10_1 | 2014 | China: Hubei | Environmental | Fish      | VppAsia |     | NNPN00000000 | This work |
| B10_2 | 2014 | China: Hubei | Environmental | Fish      | VppX    |     | NNPM00000000 | This work |
| B10_3 | 2014 | China: Hubei | Environmental | Fish      | VppAsia |     | NNPL00000000 | This work |
| B10_4 | 2014 | China: Hubei | Environmental | Fish      | VppAsia |     | NNPK00000000 | This work |
| B10_6 | 2014 | China: Hubei | Environmental | Fish      | VppAsia |     | NNPJ00000000 | This work |
| B10_7 | 2014 | China: Hubei | Environmental | Fish      | VppAsia |     | NNPI00000000 | This work |
| B10_8 | 2014 | China: Hubei | Environmental | Water     | VppAsia |     | NNPH00000000 | This work |
| B10_9 | 2014 | China: Hubei | Environmental | Fish      | VppAsia |     | NNPG00000000 | This work |
| B2_1  | 2014 | China: Hubei | Environmental | Shellfish | VppAsia | CG7 | NNPF00000000 | This work |
| B2_10 | 2014 | China: Hubei | Environmental | Fish      | VppAsia |     | NNPE00000000 | This work |
| B2_2  | 2014 | China: Hubei | Environmental | Fish      | VppAsia |     | NNPD00000000 | This work |
| B2_3  | 2014 | China: Hubei | Environmental | Shellfish | VppAsia |     | NNPC00000000 | This work |
| B2_4  | 2014 | China: Hubei | Environmental | Fish      | VppAsia |     | NNPB00000000 | This work |
| B2_5  | 2014 | China: Hubei | Environmental | Shellfish | VppAsia | CG7 | NNPA00000000 | This work |
| B2_6  | 2014 | China: Hubei | Environmental | Fish      | VppAsia |     | NNOZ00000000 | This work |
| B2_7  | 2014 | China: Hubei | Environmental | Fish      | VppAsia |     | NNOY00000000 | This work |
| B2_8  | 2014 | China: Hubei | Environmental | Fish      | VppAsia |     | NNOX00000000 | This work |
| B2_9  | 2014 | China: Hubei | Environmental | Fish      | VppAsia |     | NNOW00000000 | This work |

|       |      |              |               |           |         |     |              |           |
|-------|------|--------------|---------------|-----------|---------|-----|--------------|-----------|
| B3_1  | 2014 | China: Hubei | Environmental | Fish      | VppAsia |     | NNOV00000000 | This work |
| B3_10 | 2014 | China: Hubei | Environmental | Fish      | VppAsia |     | NNOU00000000 | This work |
| B3_2  | 2014 | China: Hubei | Environmental | Shellfish | VppAsia | CG7 | NNOT00000000 | This work |
| B3_3  | 2014 | China: Hubei | Environmental | Fish      | VppAsia | CG7 | NNOS00000000 | This work |
| B3_4  | 2014 | China: Hubei | Environmental | Fish      | VppAsia |     | NNOR00000000 | This work |
| B3_5  | 2014 | China: Hubei | Environmental | Shellfish | VppAsia |     | NNOQ00000000 | This work |
| B3_6  | 2014 | China: Hubei | Environmental | Shellfish | VppAsia | CG7 | NNOP00000000 | This work |
| B3_7  | 2014 | China: Hubei | Environmental | Fish      | VppAsia |     | NNOO00000000 | This work |
| B3_8  | 2014 | China: Hubei | Environmental | Fish      | VppAsia |     | NNON00000000 | This work |
| B3_9  | 2014 | China: Hubei | Environmental | Fish      | VppAsia |     | NNOM00000000 | This work |
| B4_1  | 2014 | China: Hubei | Environmental | Fish      | VppAsia | CG7 | NNOL00000000 | This work |
| B4_10 | 2014 | China: Hubei | Environmental | Fish      | VppAsia |     | NNOK00000000 | This work |
| B4_2  | 2014 | China: Hubei | Environmental | Fish      | VppAsia | CG7 | NNOJ00000000 | This work |
| B4_3  | 2014 | China: Hubei | Environmental | Fish      | VppAsia |     | NNOI00000000 | This work |
| B4_5  | 2014 | China: Hubei | Environmental | Fish      | VppX    |     | NNOH00000000 | This work |
| B4_6  | 2014 | China: Hubei | Environmental | Fish      | VppAsia | CG7 | NNOG00000000 | This work |
| B4_7  | 2014 | China: Hubei | Environmental | Fish      | VppAsia | CG7 | NNOF00000000 | This work |
| B4_8  | 2014 | China: Hubei | Environmental | Fish      | VppAsia |     | NNOE00000000 | This work |
| B4_9  | 2014 | China: Hubei | Environmental | Fish      | VppAsia |     | NNOD00000000 | This work |
| B5_1  | 2014 | China: Hubei | Environmental | Fish      | VppAsia | CG7 | NNOC00000000 | This work |
| B5_10 | 2014 | China: Hubei | Environmental | Water     | VppAsia |     | NNOB00000000 | This work |
| B5_2  | 2014 | China: Hubei | Environmental | Fish      | VppAsia |     | NNOA00000000 | This work |
| B5_3  | 2014 | China: Hubei | Environmental | Fish      | VppAsia |     | NNNZ00000000 | This work |
| B5_4  | 2014 | China: Hubei | Environmental | Fish      | VppAsia |     | NNNY00000000 | This work |
| B5_5  | 2014 | China: Hubei | Environmental | Fish      | VppAsia | CG7 | NNNX00000000 | This work |
| B5_6  | 2014 | China: Hubei | Environmental | Fish      | VppAsia |     | NNNW00000000 | This work |
| B5_8  | 2014 | China: Hubei | Environmental | Water     | VppAsia | CG7 | NNNV00000000 | This work |
| B5_9  | 2014 | China: Hubei | Environmental | Water     | VppAsia | CG7 | NNNU00000000 | This work |
| B6_1  | 2014 | China: Hubei | Environmental | Water     | VppAsia |     | NNNT00000000 | This work |
| B6_10 | 2014 | China: Hubei | Environmental | Water     | VppAsia |     | NNNS00000000 | This work |
| B6_2  | 2014 | China: Hubei | Environmental | Water     | VppAsia |     | NNNR00000000 | This work |
| B6_3  | 2014 | China: Hubei | Environmental | Water     | VppAsia |     | NNNQ00000000 | This work |
| B6_4  | 2014 | China: Hubei | Environmental | Fish      | VppAsia |     | NNNP00000000 | This work |
| B6_5  | 2014 | China: Hubei | Environmental | Fish      | VppAsia |     | NNNO00000000 | This work |

|       |      |                 |               |       |         |              |           |
|-------|------|-----------------|---------------|-------|---------|--------------|-----------|
| B6_6  | 2014 | China: Hubei    | Environmental | Fish  | VppAsia | NNNN00000000 | This work |
| B6_7  | 2014 | China: Hubei    | Environmental | Fish  | VppAsia | NNNM00000000 | This work |
| B6_8  | 2014 | China: Hubei    | Environmental | Water | VppAsia | NNNL00000000 | This work |
| B6_9  | 2014 | China: Hubei    | Environmental | Fish  | VppAsia | NNNK00000000 | This work |
| B7_2  | 2014 | China: Hubei    | Environmental | Fish  | VppAsia | NNNJ00000000 | This work |
| B7_3  | 2014 | China: Hubei    | Environmental | Fish  | VppAsia | NNNI00000000 | This work |
| B7_4  | 2014 | China: Hubei    | Environmental | Fish  | VppAsia | NNNH00000000 | This work |
| B7_5  | 2014 | China: Hubei    | Environmental | Fish  | VppAsia | NNNG00000000 | This work |
| B7_6  | 2014 | China: Hubei    | Environmental | Fish  | VppAsia | NNNF00000000 | This work |
| B7_7  | 2014 | China: Hubei    | Environmental | Fish  | VppAsia | NNNE00000000 | This work |
| B8_1  | 2014 | China: Hubei    | Environmental | Fish  | VppAsia | NNND00000000 | This work |
| B8_10 | 2014 | China: Hubei    | Environmental | Fish  | VppAsia | NNNC00000000 | This work |
| B8_2  | 2014 | China: Hubei    | Environmental | Fish  | VppAsia | NNNB00000000 | This work |
| B8_3  | 2014 | China: Hubei    | Environmental | Fish  | VppAsia | NNNA00000000 | This work |
| B8_4  | 2014 | China: Hubei    | Environmental | Fish  | VppAsia | NNMZ00000000 | This work |
| B8_5  | 2014 | China: Hubei    | Environmental | Fish  | VppAsia | NNMY00000000 | This work |
| B8_6  | 2014 | China: Hubei    | Environmental | Fish  | VppAsia | NNMX00000000 | This work |
| B8_7  | 2014 | China: Hubei    | Environmental | Fish  | VppAsia | NNMW00000000 | This work |
| B8_8  | 2014 | China: Hubei    | Environmental | Water | VppAsia | NNMV00000000 | This work |
| B8_9  | 2014 | China: Hubei    | Environmental | Fish  | VppAsia | NNMU00000000 | This work |
| B9_1  | 2014 | China: Hubei    | Environmental | Water | VppAsia | NNMT00000000 | This work |
| B9_10 | 2014 | China: Hubei    | Environmental | Fish  | VppAsia | NNMS00000000 | This work |
| B9_2  | 2014 | China: Hubei    | Environmental | Fish  | VppAsia | NNMR00000000 | This work |
| B9_3  | 2014 | China: Hubei    | Environmental | Fish  | VppAsia | NNMQ00000000 | This work |
| B9_4  | 2014 | China: Hubei    | Environmental | Fish  | VppAsia | NNMP00000000 | This work |
| B9_5  | 2014 | China: Hubei    | Environmental | Water | VppAsia | NNMO00000000 | This work |
| B9_6  | 2014 | China: Hubei    | Environmental | Fish  | VppAsia | NNMN00000000 | This work |
| B9_7  | 2014 | China: Hubei    | Environmental | Water | VppAsia | NNMM00000000 | This work |
| B9_8  | 2014 | China: Hubei    | Environmental | Fish  | VppAsia | NNML00000000 | This work |
| B9_9  | 2014 | China: Hubei    | Environmental | Fish  | VppAsia | NNMK00000000 | This work |
| C1_10 | 2014 | China: Shandong | Environmental | Fish  | VppAsia | NNMJ00000000 | This work |
| C1_2  | 2014 | China: Shandong | Environmental | Fish  | VppAsia | NNMI00000000 | This work |
| C1_3  | 2014 | China: Shandong | Environmental | Fish  | VppAsia | NNMH00000000 | This work |
| C1_4  | 2014 | China: Shandong | Environmental | Fish  | VppAsia | NNMG00000000 | This work |

|       |      |                 |               |       |         |              |           |
|-------|------|-----------------|---------------|-------|---------|--------------|-----------|
| C1_5  | 2014 | China: Shandong | Environmental | Fish  | VppAsia | NNMF00000000 | This work |
| C1_6  | 2014 | China: Shandong | Environmental | Fish  | VppAsia | NNME00000000 | This work |
| C1_7  | 2014 | China: Shandong | Environmental | Water | VppAsia | NNMD00000000 | This work |
| C1_8  | 2014 | China: Shandong | Environmental | Water | VppAsia | NNMC00000000 | This work |
| C1_9  | 2014 | China: Shandong | Environmental | Water | VppAsia | NNMB00000000 | This work |
| C10_4 | 2014 | China: Zhejiang | Environmental | Water | VppAsia | NNMA00000000 | This work |
| C10_5 | 2014 | China: Zhejiang | Environmental | Fish  | VppX    | NNLZ00000000 | This work |
| C2_1  | 2014 | China: Shandong | Environmental | Fish  | VppX    | NNLY00000000 | This work |
| C2_2  | 2014 | China: Shandong | Environmental | Fish  | VppAsia | NNLX00000000 | This work |
| C2_4  | 2014 | China: Shandong | Environmental | Fish  | VppAsia | NNLW00000000 | This work |
| C2_5  | 2014 | China: Shandong | Environmental | Fish  | VppAsia | NNLV00000000 | This work |
| C2_6  | 2014 | China: Shandong | Environmental | Fish  | VppAsia | NNLU00000000 | This work |
| C2_8  | 2014 | China: Shandong | Environmental | Fish  | VppAsia | NNLT00000000 | This work |
| C3_10 | 2014 | China: Shandong | Environmental | Water | VppAsia | NNLS00000000 | This work |
| C3_2  | 2014 | China: Shandong | Environmental | Fish  | VppAsia | NNLR00000000 | This work |
| C3_3  | 2014 | China: Shandong | Environmental | Fish  | VppAsia | NNLQ00000000 | This work |
| C3_4  | 2014 | China: Shandong | Environmental | Fish  | VppX    | NNLP00000000 | This work |
| C3_5  | 2014 | China: Shandong | Environmental | Fish  | VppX    | NNLO00000000 | This work |
| C3_7  | 2014 | China: Shandong | Environmental | Water | VppAsia | NNLN00000000 | This work |
| C3_9  | 2014 | China: Shandong | Environmental | Water | VppAsia | NNLM00000000 | This work |
| C4_10 | 2014 | China: Shandong | Environmental | Fish  | VppAsia | NNLL00000000 | This work |
| C4_2  | 2014 | China: Shandong | Environmental | Fish  | VppAsia | NNLK00000000 | This work |
| C4_3  | 2014 | China: Shandong | Environmental | Fish  | VppAsia | NNLJ00000000 | This work |
| C4_4  | 2014 | China: Shandong | Environmental | Fish  | VppAsia | NNLI00000000 | This work |
| C4_5  | 2014 | China: Shandong | Environmental | Fish  | VppAsia | NNLH00000000 | This work |
| C4_6  | 2014 | China: Shandong | Environmental | Fish  | VppAsia | NNLG00000000 | This work |
| C4_7  | 2014 | China: Shandong | Environmental | Fish  | VppAsia | NNLF00000000 | This work |
| C4_8  | 2014 | China: Shandong | Environmental | Fish  | VppAsia | NNLE00000000 | This work |
| C4_9  | 2014 | China: Shandong | Environmental | Fish  | VppAsia | NNLD00000000 | This work |
| C5_1  | 2014 | China: Shandong | Environmental | Fish  | VppAsia | NNLC00000000 | This work |
| C5_10 | 2014 | China: Shandong | Environmental | Water | VppAsia | NNLB00000000 | This work |
| C5_2  | 2014 | China: Shandong | Environmental | Fish  | VppAsia | NNLA00000000 | This work |
| C5_3  | 2014 | China: Shandong | Environmental | Fish  | VppAsia | NNKZ00000000 | This work |
| C5_4  | 2014 | China: Shandong | Environmental | Fish  | VppAsia | NNKY00000000 | This work |

|       |      |                 |               |          |         |     |              |           |
|-------|------|-----------------|---------------|----------|---------|-----|--------------|-----------|
| C5_5  | 2014 | China: Shandong | Environmental | Fish     | VppAsia | CG9 | NNKX00000000 | This work |
| C5_6  | 2014 | China: Shandong | Environmental | Fish     | VppX    |     | NNKW00000000 | This work |
| C5_7  | 2014 | China: Shandong | Environmental | Fish     | VppAsia |     | NNKV00000000 | This work |
| C5_8  | 2014 | China: Shandong | Environmental | Fish     | VppAsia |     | NNKU00000000 | This work |
| C5_9  | 2014 | China: Shandong | Environmental | Fish     | VppAsia |     | NNKT00000000 | This work |
| C6_1  | 2014 | China: Shandong | Environmental | Fish     | VppAsia |     | NNKS00000000 | This work |
| C6_10 | 2014 | China: Shandong | Environmental | Fish     | VppAsia |     | NNKR00000000 | This work |
| C6_2  | 2014 | China: Shandong | Environmental | Fish     | VppAsia |     | NNKQ00000000 | This work |
| C6_4  | 2014 | China: Shandong | Environmental | Fish     | VppAsia |     | NNKP00000000 | This work |
| C6_5  | 2014 | China: Shandong | Environmental | Fish     | VppAsia |     | NNKO00000000 | This work |
| C6_6  | 2014 | China: Shandong | Environmental | Fish     | VppAsia |     | NNKN00000000 | This work |
| C6_7  | 2014 | China: Shandong | Environmental | Fish     | VppAsia |     | NNKM00000000 | This work |
| C6_8  | 2014 | China: Shandong | Environmental | Fish     | VppAsia |     | NNKL00000000 | This work |
| C6_9  | 2014 | China: Shandong | Environmental | Fish     | VppAsia |     | NNKK00000000 | This work |
| C7_1  | 2014 | China: Shandong | Environmental | Water    | VppAsia |     | NNKJ00000000 | This work |
| C7_10 | 2014 | China: Shandong | Environmental | Fish     | VppAsia |     | NNKI00000000 | This work |
| C7_2  | 2014 | China: Shandong | Environmental | Water    | VppAsia |     | NNKH00000000 | This work |
| C7_3  | 2014 | China: Shandong | Environmental | Water    | VppAsia |     | NNKG00000000 | This work |
| C7_4  | 2014 | China: Shandong | Environmental | Fish     | VppAsia |     | NNKF00000000 | This work |
| C7_5  | 2014 | China: Shandong | Environmental | Fish     | VppAsia |     | NNKE00000000 | This work |
| C7_6  | 2014 | China: Shandong | Environmental | Fish     | VppAsia |     | NNKD00000000 | This work |
| C7_7  | 2014 | China: Shandong | Environmental | Fish     | VppAsia |     | NNKC00000000 | This work |
| C7_9  | 2014 | China: Shandong | Environmental | Fish     | VppAsia |     | NNKB00000000 | This work |
| C8_2  | 2014 | China: Shandong | Environmental | Fish     | VppAsia |     | NNKA00000000 | This work |
| C8_3  | 2014 | China: Shandong | Environmental | Fish     | VppAsia |     | NNJZ00000000 | This work |
| C8_4  | 2014 | China: Shandong | Environmental | Fish     | VppAsia |     | NNJY00000000 | This work |
| C8_5  | 2014 | China: Shandong | Environmental | Water    | VppX    |     | NNJX00000000 | This work |
| C8_6  | 2014 | China: Shandong | Environmental | Fish     | VppAsia |     | NNJW00000000 | This work |
| C8_7  | 2014 | China: Shandong | Environmental | Fish     | VppAsia |     | NNJV00000000 | This work |
| C8_8  | 2014 | China: Shandong | Environmental | Fish     | VppAsia |     | NNJU00000000 | This work |
| D1_1  | 2014 | China: Sichuan  | Environmental | Sediment | VppAsia |     | NNJT00000000 | This work |
| D1_3  | 2014 | China: Sichuan  | Environmental | Sediment | VppAsia |     | NNJS00000000 | This work |
| D1_4  | 2014 | China: Sichuan  | Environmental | Fish     | VppAsia |     | NNJR00000000 | This work |
| D1_7  | 2014 | China: Sichuan  | Environmental | Fish     | VppAsia |     | NNJQ00000000 | This work |

|      |      |                |               |       |         |              |           |
|------|------|----------------|---------------|-------|---------|--------------|-----------|
| D1_8 | 2014 | China: Sichuan | Environmental | Fish  | VppAsia | NNJP00000000 | This work |
| D2_2 | 2014 | China: Sichuan | Environmental | Fish  | VppAsia | NNJO00000000 | This work |
| D2_4 | 2014 | China: Sichuan | Environmental | Fish  | VppAsia | NNJN00000000 | This work |
| D2_7 | 2014 | China: Sichuan | Environmental | Fish  | VppAsia | NNJM00000000 | This work |
| D2_8 | 2014 | China: Sichuan | Environmental | Fish  | VppAsia | NNJL00000000 | This work |
| D2_9 | 2014 | China: Sichuan | Environmental | Fish  | VppAsia | NNJK00000000 | This work |
| D3_2 | 2014 | China: Sichuan | Environmental | Fish  | VppAsia | NNJJ00000000 | This work |
| D3_5 | 2014 | China: Sichuan | Environmental | Fish  | VppAsia | NNJI00000000 | This work |
| D3_6 | 2014 | China: Sichuan | Environmental | Fish  | VppAsia | NNJH00000000 | This work |
| D4_1 | 2014 | China: Sichuan | Environmental | Fish  | VppAsia | NNJG00000000 | This work |
| D4_3 | 2014 | China: Sichuan | Environmental | Fish  | VppAsia | NNJF00000000 | This work |
| D4_4 | 2014 | China: Sichuan | Environmental | Fish  | VppAsia | NNJE00000000 | This work |
| D4_5 | 2014 | China: Sichuan | Environmental | Water | VppAsia | NNJD00000000 | This work |
| D4_6 | 2014 | China: Sichuan | Environmental | Fish  | VppAsia | NNJC00000000 | This work |
| D4_7 | 2014 | China: Sichuan | Environmental | Water | VppAsia | NNJB00000000 | This work |
| D5_1 | 2014 | China: Sichuan | Environmental | Fish  | VppAsia | NNJA00000000 | This work |
| D5_3 | 2014 | China: Sichuan | Environmental | Fish  | VppAsia | NNIZ00000000 | This work |
| D5_4 | 2014 | China: Sichuan | Environmental | Fish  | VppAsia | NNIY00000000 | This work |
| D5_6 | 2014 | China: Sichuan | Environmental | Fish  | VppAsia | NNIX00000000 | This work |
| D5_7 | 2014 | China: Sichuan | Environmental | Water | VppAsia | NNIW00000000 | This work |
| D5_9 | 2014 | China: Sichuan | Environmental | Fish  | VppAsia | NNIV00000000 | This work |
| D6_1 | 2014 | China: Sichuan | Environmental | Fish  | VppAsia | NNIU00000000 | This work |
| D6_2 | 2014 | China: Sichuan | Environmental | Fish  | VppAsia | NNIT00000000 | This work |
| D6_3 | 2014 | China: Sichuan | Environmental | Water | VppAsia | NNIS00000000 | This work |
| D6_4 | 2014 | China: Sichuan | Environmental | Water | VppAsia | NNIR00000000 | This work |
| D6_5 | 2014 | China: Sichuan | Environmental | Fish  | VppAsia | NNIQ00000000 | This work |
| D6_6 | 2014 | China: Sichuan | Environmental | Water | VppAsia | NNIP00000000 | This work |
| D6_7 | 2014 | China: Sichuan | Environmental | Fish  | VppAsia | NNIO00000000 | This work |
| D6_8 | 2014 | China: Sichuan | Environmental | Fish  | VppAsia | NNIN00000000 | This work |
| D7_1 | 2014 | China: Sichuan | Environmental | Fish  | VppAsia | NNIM00000000 | This work |
| D7_2 | 2014 | China: Sichuan | Environmental | Water | VppAsia | NNIL00000000 | This work |
| D7_3 | 2014 | China: Sichuan | Environmental | Fish  | VppAsia | NNIK00000000 | This work |
| D7_4 | 2014 | China: Sichuan | Environmental | Water | VppAsia | NNIJ00000000 | This work |
| D7_6 | 2014 | China: Sichuan | Environmental | Fish  | VppAsia | NNII00000000 | This work |

|       |      |                 |               |           |         |              |           |
|-------|------|-----------------|---------------|-----------|---------|--------------|-----------|
| D7_7  | 2014 | China: Sichuan  | Environmental | Fish      | VppAsia | NNIH00000000 | This work |
| D7_8  | 2014 | China: Sichuan  | Environmental | Fish      | VppAsia | NNIG00000000 | This work |
| D8_1  | 2014 | China: Sichuan  | Environmental | Fish      | VppAsia | NNIF00000000 | This work |
| D8_2  | 2014 | China: Sichuan  | Environmental | Fish      | VppAsia | NNIE00000000 | This work |
| D8_3  | 2014 | China: Sichuan  | Environmental | Water     | VppAsia | NNID00000000 | This work |
| D8_4  | 2014 | China: Sichuan  | Environmental | Water     | VppAsia | NNIC00000000 | This work |
| D8_5  | 2014 | China: Sichuan  | Environmental | Fish      | VppAsia | NNIB00000000 | This work |
| D8_6  | 2014 | China: Sichuan  | Environmental | Fish      | VppAsia | NNIA00000000 | This work |
| D8_7  | 2014 | China: Sichuan  | Environmental | Fish      | VppAsia | NNHZ00000000 | This work |
| D8_8  | 2014 | China: Sichuan  | Environmental | Fish      | VppAsia | NNHY00000000 | This work |
| D8_9  | 2014 | China: Sichuan  | Environmental | Fish      | VppX    | NNHX00000000 | This work |
| D9_2  | 2014 | China: Sichuan  | Environmental | Fish      | VppAsia | NNHW00000000 | This work |
| D9_3  | 2014 | China: Sichuan  | Environmental | Fish      | VppAsia | NNHV00000000 | This work |
| D9_4  | 2014 | China: Sichuan  | Environmental | Fish      | VppAsia | NNHU00000000 | This work |
| D9_6  | 2014 | China: Sichuan  | Environmental | Fish      | VppAsia | NNHT00000000 | This work |
| E1_10 | 2014 | China: Zhejiang | Environmental | Fish      | VppAsia | NNHS00000000 | This work |
| E1_5  | 2014 | China: Zhejiang | Environmental | Fish      | VppAsia | NNHR00000000 | This work |
| E1_9  | 2014 | China: Zhejiang | Environmental | Fish      | VppX    | NNHQ00000000 | This work |
| E10_8 | 2014 | China: Zhejiang | Environmental | Shellfish | VppAsia | NNHP00000000 | This work |
| E10_9 | 2014 | China: Zhejiang | Environmental | Shellfish | VppAsia | NNHO00000000 | This work |
| E2_10 | 2014 | China: Zhejiang | Environmental | Fish      | VppAsia | NNHN00000000 | This work |
| E2_2  | 2014 | China: Zhejiang | Environmental | Fish      | VppAsia | NNHM00000000 | This work |
| E2_4  | 2014 | China: Zhejiang | Environmental | Fish      | VppAsia | NNHL00000000 | This work |
| E3_1  | 2014 | China: Zhejiang | Environmental | Water     | VppAsia | NNHK00000000 | This work |
| E3_10 | 2014 | China: Zhejiang | Environmental | Fish      | VppAsia | NNHJ00000000 | This work |
| E3_6  | 2014 | China: Zhejiang | Environmental | Fish      | VppAsia | NNHI00000000 | This work |
| E4_10 | 2014 | China: Zhejiang | Environmental | Fish      | VppAsia | NNHH00000000 | This work |
| E4_2  | 2014 | China: Zhejiang | Environmental | Fish      | VppX    | NNHG00000000 | This work |
| E4_3  | 2014 | China: Zhejiang | Environmental | Fish      | VppAsia | NNHF00000000 | This work |
| E4_4  | 2014 | China: Zhejiang | Environmental | Fish      | VppAsia | NNHE00000000 | This work |
| E4_9  | 2014 | China: Zhejiang | Environmental | Fish      | VppAsia | NNHD00000000 | This work |
| E5_8  | 2014 | China: Zhejiang | Environmental | Fish      | VppAsia | NNHC00000000 | This work |
| E6_4  | 2014 | China: Zhejiang | Environmental | Water     | VppAsia | NNHB00000000 | This work |
| E7_10 | 2014 | China: Zhejiang | Environmental | Fish      | VppAsia | NNHA00000000 | This work |



|        |      |                 |               |           |         |     |              |           |
|--------|------|-----------------|---------------|-----------|---------|-----|--------------|-----------|
| E7_9   | 2014 | China: Zhejiang | Environmental | Fish      | VppAsia |     | NNGZ00000000 | This work |
| E9_7   | 2014 | China: Zhejiang | Environmental | Shellfish | VppAsia |     | NNGY00000000 | This work |
| E9_8   | 2014 | China: Zhejiang | Environmental | Shellfish | VppAsia |     | NNGX00000000 | This work |
| F1_1   | 2014 | China: Guangxi  | Environmental | Fish      | VppAsia |     | NNGW00000000 | This work |
| F1_10  | 2014 | China: Guangxi  | Environmental | Fish      | VppAsia | CG9 | NNGV00000000 | This work |
| F1_2   | 2014 | China: Guangxi  | Environmental | Fish      | VppAsia |     | NNGU00000000 | This work |
| F1_3   | 2014 | China: Guangxi  | Environmental | Fish      | VppAsia |     | NNGT00000000 | This work |
| F1_4   | 2014 | China: Guangxi  | Environmental | Fish      | VppAsia |     | NNGS00000000 | This work |
| F1_5   | 2014 | China: Guangxi  | Environmental | Fish      | VppAsia |     | NNGR00000000 | This work |
| F1_6   | 2014 | China: Guangxi  | Environmental | Water     | VppAsia |     | NNGQ00000000 | This work |
| F1_7   | 2014 | China: Guangxi  | Environmental | Water     | VppAsia | CG9 | NNGP00000000 | This work |
| F1_8   | 2014 | China: Guangxi  | Environmental | Fish      | VppAsia | CG9 | NNGO00000000 | This work |
| F1_9   | 2014 | China: Guangxi  | Environmental | Fish      | VppAsia | CG9 | NNGN00000000 | This work |
| F10_1  | 2014 | China: Guangxi  | Environmental | Fish      | VppAsia |     | NNGM00000000 | This work |
| F10_10 | 2014 | China: Guangxi  | Environmental | Fish      | VppAsia |     | NNGL00000000 | This work |
| F10_2  | 2014 | China: Guangxi  | Environmental | Fish      | VppAsia |     | NNGK00000000 | This work |
| F10_3  | 2014 | China: Guangxi  | Environmental | Fish      | VppAsia |     | NNGJ00000000 | This work |
| F10_4  | 2014 | China: Guangxi  | Environmental | Fish      | VppAsia |     | NNGI00000000 | This work |
| F10_5  | 2014 | China: Guangxi  | Environmental | Fish      | VppAsia |     | NNGH00000000 | This work |
| F10_6  | 2014 | China: Guangxi  | Environmental | Fish      | VppAsia |     | NNGG00000000 | This work |
| F10_7  | 2014 | China: Guangxi  | Environmental | Fish      | VppAsia |     | NNGF00000000 | This work |
| F10_8  | 2014 | China: Guangxi  | Environmental | Fish      | VppAsia |     | NNGE00000000 | This work |
| F10_9  | 2014 | China: Guangxi  | Environmental | Fish      | VppAsia |     | NNGD00000000 | This work |
| F2_1   | 2014 | China: Guangxi  | Environmental | Water     | VppAsia | CG9 | NNGC00000000 | This work |
| F2_10  | 2014 | China: Guangxi  | Environmental | Fish      | VppAsia | CG1 | NNGB00000000 | This work |
| F2_2   | 2014 | China: Guangxi  | Environmental | Water     | VppAsia | CG9 | NNGA00000000 | This work |
| F2_3   | 2014 | China: Guangxi  | Environmental | Water     | VppAsia | CG9 | NNFZ00000000 | This work |
| F2_4   | 2014 | China: Guangxi  | Environmental | Fish      | VppAsia | CG9 | NNFY00000000 | This work |
| F2_5   | 2014 | China: Guangxi  | Environmental | Water     | VppAsia | CG9 | NNFX00000000 | This work |
| F2_6   | 2014 | China: Guangxi  | Environmental | Fish      | VppAsia | CG9 | NNFW00000000 | This work |
| F2_7   | 2014 | China: Guangxi  | Environmental | Water     | VppAsia | CG1 | NNFV00000000 | This work |
| F2_8   | 2014 | China: Guangxi  | Environmental | Fish      | VppAsia | CG1 | NNFU00000000 | This work |
| F2_9   | 2014 | China: Guangxi  | Environmental | Water     | VppAsia | CG1 | NNFT00000000 | This work |
| F3_1   | 2014 | China: Guangxi  | Environmental | Fish      | VppAsia | CG1 | NNFS00000000 | This work |

|       |      |                |               |           |         |     |              |           |
|-------|------|----------------|---------------|-----------|---------|-----|--------------|-----------|
| F3_10 | 2014 | China: Guangxi | Environmental | Water     | VppAsia | CG1 | NNFR00000000 | This work |
| F3_2  | 2014 | China: Guangxi | Environmental | Fish      | VppAsia | CG1 | NNFQ00000000 | This work |
| F3_3  | 2014 | China: Guangxi | Environmental | Water     | VppAsia | CG1 | NNFP00000000 | This work |
| F3_4  | 2014 | China: Guangxi | Environmental | Fish      | VppAsia | CG1 | NNFO00000000 | This work |
| F3_5  | 2014 | China: Guangxi | Environmental | Fish      | VppAsia | CG1 | NNFN00000000 | This work |
| F3_6  | 2014 | China: Guangxi | Environmental | Fish      | VppAsia | CG1 | NNFM00000000 | This work |
| F3_7  | 2014 | China: Guangxi | Environmental | Shellfish | VppAsia | CG1 | NNFL00000000 | This work |
| F3_8  | 2014 | China: Guangxi | Environmental | Fish      | VppAsia | CG1 | NNFK00000000 | This work |
| F3_9  | 2014 | China: Guangxi | Environmental | Water     | VppAsia | CG1 | NNFJ00000000 | This work |
| F4_1  | 2014 | China: Guangxi | Environmental | Fish      | VppAsia | CG9 | NNFI00000000 | This work |
| F4_10 | 2014 | China: Guangxi | Environmental | Sediment  | VppAsia |     | NNFH00000000 | This work |
| F4_2  | 2014 | China: Guangxi | Environmental | Fish      | VppAsia |     | NNFG00000000 | This work |
| F4_3  | 2014 | China: Guangxi | Environmental | Fish      | VppAsia |     | NNFF00000000 | This work |
| F4_4  | 2014 | China: Guangxi | Environmental | Fish      | VppX    |     | NNFE00000000 | This work |
| F4_5  | 2014 | China: Guangxi | Environmental | Fish      | VppX    |     | NNFD00000000 | This work |
| F4_6  | 2014 | China: Guangxi | Environmental | Water     | VppAsia |     | NNFC00000000 | This work |
| F4_7  | 2014 | China: Guangxi | Environmental | Water     | VppAsia |     | NNFB00000000 | This work |
| F4_8  | 2014 | China: Guangxi | Environmental | Water     | VppAsia |     | NNFA00000000 | This work |
| F4_9  | 2014 | China: Guangxi | Environmental | Sediment  | VppAsia |     | NNEZ00000000 | This work |
| F5_1  | 2014 | China: Guangxi | Environmental | Sediment  | VppAsia |     | NNEY00000000 | This work |
| F5_10 | 2014 | China: Guangxi | Environmental | Fish      | VppAsia |     | NNEX00000000 | This work |
| F5_3  | 2014 | China: Guangxi | Environmental | Fish      | VppAsia |     | NNEW00000000 | This work |
| F5_4  | 2014 | China: Guangxi | Environmental | Fish      | VppAsia |     | NNEV00000000 | This work |
| F5_5  | 2014 | China: Guangxi | Environmental | Fish      | VppAsia |     | NNEU00000000 | This work |
| F5_6  | 2014 | China: Guangxi | Environmental | Fish      | VppAsia |     | NNET00000000 | This work |
| F5_7  | 2014 | China: Guangxi | Environmental | Fish      | VppAsia |     | NNES00000000 | This work |
| F5_8  | 2014 | China: Guangxi | Environmental | Water     | VppAsia |     | NNER00000000 | This work |
| F5_9  | 2014 | China: Guangxi | Environmental | Fish      | VppAsia |     | NNEQ00000000 | This work |
| F6_1  | 2014 | China: Guangxi | Environmental | Water     | VppAsia |     | NNEP00000000 | This work |
| F6_2  | 2014 | China: Guangxi | Environmental | Water     | VppAsia |     | NNEO00000000 | This work |
| F6_3  | 2014 | China: Guangxi | Environmental | Water     | VppAsia |     | NNEN00000000 | This work |
| F6_4  | 2014 | China: Guangxi | Environmental | Sediment  | VppAsia |     | NNEM00000000 | This work |
| F6_5  | 2014 | China: Guangxi | Environmental | Fish      | VppAsia |     | NNEL00000000 | This work |
| F6_6  | 2014 | China: Guangxi | Environmental | Fish      | VppAsia |     | NNEK00000000 | This work |

|       |      |                |               |       |         |     |              |           |
|-------|------|----------------|---------------|-------|---------|-----|--------------|-----------|
| F6_7  | 2014 | China: Guangxi | Environmental | Fish  | VppAsia |     | NNEJ00000000 | This work |
| F6_8  | 2014 | China: Guangxi | Environmental | Fish  | VppAsia |     | NNEI00000000 | This work |
| F6_9  | 2014 | China: Guangxi | Environmental | Fish  | VppAsia |     | NNEH00000000 | This work |
| F7_10 | 2014 | China: Guangxi | Environmental | Water | VppAsia |     | NNEG00000000 | This work |
| F7_2  | 2014 | China: Guangxi | Environmental | Fish  | VppAsia |     | NNEF00000000 | This work |
| F7_3  | 2014 | China: Guangxi | Environmental | Water | VppAsia |     | NNEE00000000 | This work |
| F7_4  | 2014 | China: Guangxi | Environmental | Fish  | VppAsia |     | NNED00000000 | This work |
| F7_6  | 2014 | China: Guangxi | Environmental | Fish  | VppAsia |     | NNEC00000000 | This work |
| F7_7  | 2014 | China: Guangxi | Environmental | Water | VppAsia |     | NNEB00000000 | This work |
| F7_8  | 2014 | China: Guangxi | Environmental | Fish  | VppAsia |     | NNEA00000000 | This work |
| F7_9  | 2014 | China: Guangxi | Environmental | Water | VppAsia |     | NNDZ00000000 | This work |
| F8_1  | 2014 | China: Guangxi | Environmental | Water | VppAsia |     | NNDY00000000 | This work |
| F8_10 | 2014 | China: Guangxi | Environmental | Fish  | VppAsia |     | NNDX00000000 | This work |
| F8_2  | 2014 | China: Guangxi | Environmental | Water | VppAsia |     | NNDW00000000 | This work |
| F8_3  | 2014 | China: Guangxi | Environmental | Water | VppX    |     | NNDV00000000 | This work |
| F8_4  | 2014 | China: Guangxi | Environmental | Water | VppAsia |     | NNDU00000000 | This work |
| F8_5  | 2014 | China: Guangxi | Environmental | Fish  | VppAsia |     | NNDT00000000 | This work |
| F8_6  | 2014 | China: Guangxi | Environmental | Fish  | VppAsia |     | NNDS00000000 | This work |
| F8_7  | 2014 | China: Guangxi | Environmental | Fish  | VppAsia |     | NNDR00000000 | This work |
| F8_8  | 2014 | China: Guangxi | Environmental | Fish  | VppAsia |     | NNDQ00000000 | This work |
| F8_9  | 2014 | China: Guangxi | Environmental | Fish  | VppAsia |     | NNDP00000000 | This work |
| F9_1  | 2014 | China: Guangxi | Environmental | Fish  | VppAsia |     | NNDO00000000 | This work |
| F9_10 | 2014 | China: Guangxi | Environmental | Fish  | VppAsia |     | NNDN00000000 | This work |
| F9_2  | 2014 | China: Guangxi | Environmental | Fish  | VppAsia |     | NNDM00000000 | This work |
| F9_3  | 2014 | China: Guangxi | Environmental | Fish  | VppAsia |     | NNDL00000000 | This work |
| F9_4  | 2014 | China: Guangxi | Environmental | Fish  | VppAsia |     | NNDK00000000 | This work |
| F9_5  | 2014 | China: Guangxi | Environmental | Fish  | VppAsia |     | NNDJ00000000 | This work |
| F9_6  | 2014 | China: Guangxi | Environmental | Fish  | VppAsia |     | NNDI00000000 | This work |
| F9_7  | 2014 | China: Guangxi | Environmental | Fish  | VppAsia |     | NNDH00000000 | This work |
| F9_8  | 2014 | China: Guangxi | Environmental | Fish  | VppAsia |     | NNDG00000000 | This work |
| F9_9  | 2014 | China: Guangxi | Environmental | Fish  | VppAsia |     | NNDF00000000 | This work |
| G1_1  | 2014 | China: Guangxi | Environmental | Fish  | VppAsia |     | NNDE00000000 | This work |
| G1_10 | 2014 | China: Guangxi | Environmental | Water | VppAsia | CG1 | NNDD00000000 | This work |
| G1_2  | 2014 | China: Guangxi | Environmental | Fish  | VppAsia |     | NNDC00000000 | This work |

|      |      |                |               |           |         |      |                 |           |
|------|------|----------------|---------------|-----------|---------|------|-----------------|-----------|
| G1_3 | 2014 | China: Guangxi | Environmental | Water     | VppAsia | CG1  | NNDB00000000    | This work |
| G1_4 | 2014 | China: Guangxi | Environmental | Water     | VppAsia | CG1  | NNDA00000000    | This work |
| G1_5 | 2014 | China: Guangxi | Environmental | Water     | VppAsia | CG1  | NNCZ00000000    | This work |
| G1_6 | 2014 | China: Guangxi | Environmental | Fish      | VppAsia | CG1  | NNCY00000000    | This work |
| G1_7 | 2014 | China: Guangxi | Environmental | Fish      | VppAsia | CG1  | NNCX00000000    | This work |
| G1_8 | 2014 | China: Guangxi | Environmental | Shellfish | VppAsia | CG1  | NNCW00000000    | This work |
| G1_9 | 2014 | China: Guangxi | Environmental | Fish      | VppAsia | CG1  | NNCV00000000    | This work |
| G2_1 | 2014 | China: Guangxi | Environmental | Shellfish | VppAsia | CG1  | NNCU00000000    | This work |
| G2_2 | 2014 | China: Guangxi | Environmental | Water     | VppAsia | CG1  | NNCT00000000    | This work |
| G2_3 | 2014 | China: Guangxi | Environmental | Fish      | VppAsia |      | NNCS00000000    | This work |
| G2_5 | 2014 | China: Guangxi | Environmental | Fish      | VppAsia |      | NNCR00000000    | This work |
| G2_6 | 2014 | China: Guangxi | Environmental | Water     | VppAsia |      | NNCQ00000000    | This work |
| G2_7 | 2014 | China: Guangxi | Environmental | Sediment  | VppAsia |      | NNCP00000000    | This work |
| S010 | NA   | NA             | NA            | NA        | VppAsia | CG12 | NNCO00000000    | This work |
| S061 | NA   | NA             | NA            | NA        | VppAsia | CG1  | NNCN00000000    | This work |
| S089 | NA   | NA             | NA            | NA        | VppAsia | CG1  | NNCM00000000    | This work |
| S107 | NA   | NA             | NA            | NA        | VppAsia |      | NNCL00000000    | This work |
| S149 | NA   | NA             | NA            | NA        | VppAsia |      | NNCK00000000    | This work |
| S175 | NA   | NA             | NA            | NA        | VppAsia | CG1  | NNCJ00000000    | This work |
| S176 | NA   | NA             | NA            | NA        | VppAsia |      | NNCI00000000    | This work |
| S177 | NA   | NA             | NA            | NA        | VppAsia | CG12 | NNCH00000000    | This work |
| S178 | NA   | NA             | NA            | NA        | VppAsia |      | NNCG00000000    | This work |
| 49   | 2007 | USA: WA        | Environmental | Shellfish | VppAsia |      | GCA_000877625.1 | GeneBank  |
| 50   | 2006 | USA            | Clinical      | Stool     | VppUS1  |      | GCA_000519385.2 | GeneBank  |
| 605  | 2006 | USA            | Environmental | Water     | VppAsia | CG1  | GCA_000519365.2 | GeneBank  |
| 846  | 2007 | USA: WA        | Environmental | Shellfish | VppX    | CG2  | GCA_000877405.1 | GeneBank  |
| 861  | NA   | NA             | Environmental | NA        | VppAsia | CG1  | GCA_000524535.2 | GeneBank  |
| 863  | 2007 | USA: WA        | Environmental | Others    | VppAsia | CG1  | GCA_000877485.1 | GeneBank  |
| 930  | 2007 | USA: WA        | Environmental | Shellfish | VppAsia | CG1  | GCA_000877475.1 | GeneBank  |
| 949  | NA   | NA             | Environmental | NA        | VppAsia | CG1  | GCA_000454455.1 | GeneBank  |
| 1682 | 2004 | Norway         | Clinical      | Wound     | VppAsia |      | GCA_001951115.1 | GeneBank  |
| 3256 | 2007 | USA            | Clinical      | Stool     | VppX    | CG2  | GCA_000519405.2 | GeneBank  |
| 3259 | NA   | NA             | Environmental | NA        | VppAsia |      | GCA_000454245.1 | GeneBank  |
| 3324 | 2007 | USA: WA        | Clinical      | Stool     | VppX    | CG2  | GCA_000877495.1 | GeneBank  |

|         |      |                  |               |       |         |     |                          |
|---------|------|------------------|---------------|-------|---------|-----|--------------------------|
| 3355    | 2007 | USA: WA          | Clinical      | Stool | VppAsia |     | GCA_000877615.1 GeneBank |
| 3631    | 2007 | USA: WA          | Clinical      | Stool | VppAsia | CG6 | GCA_000877595.1 GeneBank |
| 3644    | 2007 | USA: WA          | Clinical      | Stool | VppUS2  | CG5 | GCA_000877755.1 GeneBank |
| 3646    | 2007 | USA: WA          | Clinical      | Stool | VppAsia | CG6 | GCA_000877765.1 GeneBank |
| 10290   | NA   | NA               | Environmental | NA    | VppX    | CG2 | GCA_000454205.1 GeneBank |
| 10296   | 1997 | USA              | Clinical      | Stool | VppX    | CG2 | GCA_000500105.2 GeneBank |
| 10329   | 1998 | USA: WA          | Clinical      | Stool | VppX    | CG2 | GCA_001188185.1 GeneBank |
| 12310   | NA   | NA               | Environmental | NA    | VppX    | CG2 | GCA_000500755.2 GeneBank |
| 12315   | 2006 | USA: WA          | Clinical      | Stool | VppX    | CG2 | GCA_000877535.1 GeneBank |
| 22702   | 1998 | USA: GA          | Environmental | NA    | VppUS2  |     | GCA_000958645.1 GeneBank |
| 30824   | 1999 | Spain: Galicia   | Clinical      | NA    | VppAsia |     | SRR2134436 GeneBank      |
| 100135  | 2010 | China: Guangdong | Clinical      | Stool | VppAsia | CG3 | GCA_001895505.1 GeneBank |
| 100136  | 2008 | China: Guangdong | Clinical      | Stool | VppAsia | CG3 | GCA_001895615.1 GeneBank |
| 100138  | 2008 | China: Guangdong | Clinical      | Stool | VppAsia | CG1 | GCA_001895665.1 GeneBank |
| 100139  | 2014 | China: Guangdong | Clinical      | Stool | VppAsia | CG3 | GCA_001895585.1 GeneBank |
| 100142  | 2010 | China: Guangdong | Clinical      | Stool | VppAsia | CG3 | GCA_001895705.1 GeneBank |
| 100143  | 2013 | China: Guangdong | Clinical      | Stool | VppAsia | CG3 | GCA_001895515.1 GeneBank |
| 100144  | 2014 | China: Guangdong | Clinical      | Stool | VppAsia | CG3 | GCA_001895685.1 GeneBank |
| 100145  | 2013 | China: Guangdong | Clinical      | Stool | VppAsia | CG1 | GCA_001895695.1 GeneBank |
| 100146  | 2009 | China: Guangdong | Clinical      | Stool | VppAsia | CG3 | GCA_001895745.1 GeneBank |
| 100147  | 2009 | China: Guangdong | Clinical      | Stool | VppAsia | CG3 | GCA_001895535.1 GeneBank |
| 100148  | 2009 | China: Guangdong | Clinical      | Stool | VppAsia | CG3 | GCA_001895525.1 GeneBank |
| 100149  | 2015 | China: Guangdong | Clinical      | Stool | VppAsia | CG3 | GCA_001895345.1 GeneBank |
| 100150  | 2008 | China: Guangdong | Clinical      | Stool | VppAsia | CG1 | GCA_001895425.1 GeneBank |
| 100151  | 2010 | China: Guangdong | Clinical      | Stool | VppAsia | CG1 | GCA_001895595.1 GeneBank |
| 100152  | 2010 | China: Guangdong | Clinical      | Stool | VppAsia | CG1 | GCA_001895435.1 GeneBank |
| 100153  | 2009 | China: Guangdong | Clinical      | Stool | VppAsia | CG1 | GCA_001895445.1 GeneBank |
| 100154  | 2012 | China: Guangdong | Clinical      | Stool | VppAsia | CG3 | GCA_001895365.1 GeneBank |
| 100156  | 2013 | China: Guangdong | Clinical      | Stool | VppAsia | CG3 | GCA_001895465.1 GeneBank |
| 100157  | 2009 | China: Guangdong | Clinical      | Stool | VppAsia | CG3 | GCA_001895635.1 GeneBank |
| 100158  | 2015 | China: Guangdong | Clinical      | Stool | VppAsia | CG3 | GCA_001895355.1 GeneBank |
| 901128  | 1997 | USA: WA          | Clinical      | Stool | Hybrid  |     | GCA_000877675.1 GeneBank |
| 970107  | 1997 | USA              | Environmental | Water | VppAsia |     | GCA_000510605.2 GeneBank |
| 04.2548 | 2004 | Canada: Ontario  | Clinical      | NA    | VppAsia |     | GCA_000786855.1 GeneBank |

|         |      |                          |               |       |         |      |                          |
|---------|------|--------------------------|---------------|-------|---------|------|--------------------------|
| 04-1290 | 2004 | Canada: Alberta          | Clinical      | NA    | VppX    | CG2  | GCA_000878815.1 GeneBank |
| 04-2192 | 2004 | Canada: Saskatchewan     | Clinical      | Stool | VppAsia |      | GCA_001609555.1 GeneBank |
| 04-2549 | 2004 | Canada: Ontario          | Clinical      | NA    | VppAsia | CG1  | GCA_000951795.1 GeneBank |
| 04-2550 | 2004 | Canada: Ontario          | Clinical      | Stool | VppX    |      | GCA_001610595.1 GeneBank |
| 04-2551 | 2004 | Canada: Ontario          | Clinical      | NA    | VppAsia | CG1  | GCA_000975195.1 GeneBank |
| 05-3133 | 2005 | Canada: Alberta          | Clinical      | Stool | VppUS2  | CG5  | GCA_001608505.1 GeneBank |
| 05-4792 | 2005 | Canada: Alberta          | Clinical      | Stool | VppX    |      | GCA_001609435.1 GeneBank |
| 06-043  | 2006 | Mozambique               | Environmental | NA    | VppAsia |      | GCA_001856035.1 GeneBank |
| 07-1339 | 2007 | Canada: British Columbia | Clinical      | NA    | VppAsia | CG1  | GCA_000972045.1 GeneBank |
| 07-2964 | 2007 | Canada: Saskatchewan     | Clinical      | Stool | VppAsia | CG13 | GCA_001608945.1 GeneBank |
| 07-2965 | 2007 | Canada: Alberta          | Clinical      | NA    | VppAsia |      | GCA_000960565.1 GeneBank |
| 08-0278 | 2008 | Canada: Alberta          | Clinical      | NA    | VppAsia |      | GCA_000960645.1 GeneBank |
| 09.5357 | 2009 | Canada: New Brunswick    | Clinical      | NA    | VppAsia |      | GCA_000786865.1 GeneBank |
| 09-1772 | 2009 | Canada: Alberta          | Clinical      | Stool | VppAsia | CG6  | GCA_001609025.1 GeneBank |
| 09-3216 | 2009 | Canada: British Columbia | Clinical      | NA    | VppX    | CG2  | GCA_000878785.1 GeneBank |
| 09-3217 | 2009 | Canada: British Columbia | Clinical      | NA    | VppUS2  | CG5  | GCA_000960655.1 GeneBank |
| 09-3218 | 2009 | Canada: British Columbia | Clinical      | NA    | VppAsia | CG6  | GCA_000974905.1 GeneBank |
| 09-3219 | 2009 | Canada: British Columbia | Clinical      | Stool | VppX    | CG2  | GCA_001608935.1 GeneBank |
| 09-4434 | 2009 | Canada: Alberta          | Clinical      | NA    | VppAsia | CG6  | GCA_000972125.1 GeneBank |
| 09-4435 | 2009 | Canada: British Columbia | Clinical      | NA    | VppAsia | CG1  | GCA_000960685.1 GeneBank |
| 09-4436 | 2009 | Canada: PEI              | Clinical      | Stool | VppAsia | CG10 | GCA_001608525.1 GeneBank |
| 09-4660 | 2009 | Canada: British Columbia | Clinical      | NA    | VppAsia | CG6  | GCA_000972055.1 GeneBank |
| 09-4661 | 2009 | Canada: British Columbia | Clinical      | Stool | VppAsia | CG6  | GCA_001559885.1 GeneBank |
| 09-4662 | 2009 | Canada: British Columbia | Clinical      | Stool | VppAsia | CG6  | GCA_001609015.1 GeneBank |
| 09-4663 | 2009 | Canada: British Columbia | Clinical      | NA    | VppAsia | CG6  | GCA_001006115.1 GeneBank |
| 09-4664 | 2009 | Canada: British Columbia | Clinical      | NA    | VppAsia | CG6  | GCA_000972035.1 GeneBank |
| 09-4665 | 2009 | Canada: British Columbia | Clinical      | Stool | VppAsia | CG6  | GCA_001608575.1 GeneBank |
| 09-4666 | 2009 | Canada: British Columbia | Clinical      | Stool | VppAsia | CG6  | GCA_001609575.1 GeneBank |
| 09-4681 | 2009 | Canada: New Brunswick    | Clinical      | NA    | VppX    |      | GCA_000972025.1 GeneBank |
| 10-4241 | 2006 | Canada: British Columbia | Clinical      | NA    | VppX    | CG2  | GCA_000878805.1 GeneBank |
| 10-4242 | 2006 | Canada: British Columbia | Clinical      | NA    | VppX    | CG2  | GCA_000878755.1 GeneBank |
| 10-4243 | 2006 | Canada: British Columbia | Clinical      | NA    | VppX    |      | GCA_000972105.1 GeneBank |
| 10-4244 | 2006 | Canada: British Columbia | Clinical      | NA    | VppX    |      | GCA_001006125.1 GeneBank |
| 10-4245 | 2006 | Canada: British Columbia | Clinical      | NA    | VppX    | CG2  | GCA_000878725.1 GeneBank |

|               |      |                          |               |           |         |     |                          |
|---------------|------|--------------------------|---------------|-----------|---------|-----|--------------------------|
| 10-4246       | 2006 | Canada: British Columbia | Clinical      | NA        | VppX    | CG2 | GCA_000878705.1 GeneBank |
| 10-4247       | 2006 | Canada: British Columbia | Clinical      | NA        | VppX    | CG2 | GCA_000878665.1 GeneBank |
| 10-4248       | 2006 | Canada: British Columbia | Clinical      | NA        | VppX    | CG2 | GCA_000878675.1 GeneBank |
| 10-4251       | 2006 | Canada: British Columbia | Clinical      | NA        | VppAsia | CG1 | GCA_001006105.1 GeneBank |
| 10-4255       | 2006 | Canada: British Columbia | Clinical      | NA        | VppUS2  | CG5 | GCA_001006195.1 GeneBank |
| 10-4274       | 2005 | Canada: British Columbia | Clinical      | NA        | VppX    | CG2 | GCA_000878735.1 GeneBank |
| 10-4287       | 2003 | Canada: British Columbia | Clinical      | NA        | VppX    | CG8 | GCA_001006185.1 GeneBank |
| 10-4288       | 2003 | Canada: British Columbia | Clinical      | NA        | VppX    | CG2 | GCA_000878645.1 GeneBank |
| 10-4293       | 2002 | Canada: British Columbia | Clinical      | NA        | VppX    | CG2 | GCA_000878595.1 GeneBank |
| 10-4298       | 2001 | Canada: British Columbia | Clinical      | NA        | VppX    | CG2 | GCA_000878565.1 GeneBank |
| 10-4303       | 2000 | Canada: British Columbia | Clinical      | NA        | VppX    | CG2 | GCA_000878575.1 GeneBank |
| 10-7197       | 2008 | Canada: British Columbia | Clinical      | NA        | VppX    | CG2 | GCA_000878585.1 GeneBank |
| 10-7205       | 2008 | Canada: British Columbia | Clinical      | NA        | VppAsia | CG6 | GCA_001006205.1 GeneBank |
| 13-028/A2     | 2013 | Vietnam                  | Environmental | Shellfish | VppAsia |     | GCA_000732245.1 GeneBank |
| 13-028/A3     | 2013 | Vietnam                  | Environmental | Shellfish | VppAsia |     | GCA_000737635.1 GeneBank |
| 14-1072-D-VP  | NA   | NA                       | NA            | NA        | VppAsia |     | SRR5639920 GeneBank      |
| 14-1073-H-VP  | 2014 | UK                       | Environmental | Shellfish | VppAsia |     | SRR5639916 GeneBank      |
| 14-1498-F-VP  | 2014 | UK                       | Environmental | Shellfish | VppUS2  |     | SRR5639919 GeneBank      |
| 14-1499-VP    | 2014 | UK                       | Environmental | Shellfish | VppUS2  |     | SRR5639914 GeneBank      |
| 14-559-B-VP   | 2014 | UK                       | Environmental | Shellfish | VppAsia |     | SRR5639913 GeneBank      |
| 14-692-A-1-VP | 2014 | UK                       | Environmental | Shellfish | VppAsia |     | SRR5639915 GeneBank      |
| 428-00        | 1998 | Spain: Galicia           | Clinical      | NA        | VppAsia |     | SRR2134435 GeneBank      |
| 906-97        | 1996 | Peru                     | Clinical      | NA        | VppAsia | CG1 | SRR2134448 GeneBank      |
| 97-10290      | 1997 | USA: WA                  | Clinical      | Stool     | VppX    | CG2 | GCA_000877425.1 GeneBank |
| 9808-1        | 2004 | Spain: Galicia           | Clinical      | NA        | VppAsia | CG1 | SRR2134445 GeneBank      |
| 98-513-F52    | 1998 | USA: LA                  | Environmental | NA        | VppUS1  |     | GCA_001188135.1 GeneBank |
| A0EZ383       | 2000 | Canada: British Columbia | Clinical      | Stool     | VppAsia |     | GCA_001609055.1 GeneBank |
| A0EZ608       | 2000 | Canada: British Columbia | Clinical      | Stool     | VppX    | CG2 | GCA_001608655.1 GeneBank |
| A0EZ664       | 2000 | Canada: British Columbia | Clinical      | Stool     | VppX    | CG8 | GCA_001608605.1 GeneBank |
| A0EZ713       | 2000 | Canada: British Columbia | Clinical      | Stool     | VppX    | CG8 | GCA_001608705.1 GeneBank |
| A1EZ679       | 2001 | Canada: British Columbia | Clinical      | Stool     | VppX    | CG2 | GCA_001609075.1 GeneBank |
| A1EZ919       | 2001 | Canada: British Columbia | Clinical      | Stool     | VppX    | CG2 | GCA_001559895.1 GeneBank |
| A1EZ952       | 2001 | Canada: British Columbia | Clinical      | Stool     | VppUS2  | CG5 | GCA_001609185.1 GeneBank |
| A2EZ523       | 2002 | Canada: British Columbia | Clinical      | Stool     | VppX    | CG2 | GCA_001609095.1 GeneBank |

|            |      |                          |               |           |         |     |                 |          |
|------------|------|--------------------------|---------------|-----------|---------|-----|-----------------|----------|
| A2EZ614    | 2002 | Canada: British Columbia | Clinical      | Stool     | VppUS2  | CG5 | GCA_001608735.1 | GeneBank |
| A2EZ715    | 2002 | Canada: British Columbia | Clinical      | Stool     | VppX    | CG2 | GCA_001608675.1 | GeneBank |
| A2EZ743    | 2002 | Canada: British Columbia | Clinical      | Stool     | VppUS1  |     | GCA_001608765.1 | GeneBank |
| A3EZ136    | 2003 | Canada: British Columbia | Clinical      | Stool     | VppAsia | CG1 | GCA_001608785.1 | GeneBank |
| A3EZ634    | 2003 | Canada: British Columbia | Clinical      | Stool     | VppX    | CG8 | GCA_001609105.1 | GeneBank |
| A3EZ710    | 2003 | Canada: British Columbia | Clinical      | Stool     | VppUS2  | CG5 | GCA_001608995.1 | GeneBank |
| A3EZ711    | 2003 | Canada: British Columbia | Clinical      | Stool     | VppUS2  | CG5 | GCA_001608975.1 | GeneBank |
| A3EZ770    | 2003 | Canada: British Columbia | Clinical      | Stool     | VppX    | CG8 | GCA_001609135.1 | GeneBank |
| A3EZ799    | 2003 | Canada: British Columbia | Clinical      | Stool     | VppUS2  | CG5 | GCA_001609155.1 | GeneBank |
| A3EZ936    | 2003 | Canada: British Columbia | Clinical      | Stool     | VppAsia |     | GCA_001609175.1 | GeneBank |
| A4EZ700    | 2004 | Canada: British Columbia | Clinical      | Stool     | VppUS2  | CG5 | GCA_001559805.1 | GeneBank |
| A4EZ703    | 2004 | Canada: British Columbia | Clinical      | Stool     | VppX    |     | GCA_001584415.1 | GeneBank |
| A4EZ724    | 2004 | Canada: British Columbia | Clinical      | Stool     | VppUS2  | CG5 | GCA_001595575.1 | GeneBank |
| A4EZ927    | 2004 | Canada: British Columbia | Clinical      | Stool     | VppAsia | CG1 | GCA_001595565.1 | GeneBank |
| A4EZ964    | 2004 | Canada: British Columbia | Clinical      | Stool     | VppX    |     | GCA_001609715.1 | GeneBank |
| A5Z1022    | 2005 | Canada: British Columbia | Clinical      | Stool     | VppAsia |     | GCA_001608755.1 | GeneBank |
| A5Z273     | 2005 | Canada: British Columbia | Clinical      | Stool     | VppAsia | CG1 | GCA_001609595.1 | GeneBank |
| A5Z652     | 2005 | Canada: British Columbia | Clinical      | Stool     | VppX    | CG2 | GCA_001609515.1 | GeneBank |
| A5Z853     | 2005 | Canada: British Columbia | Clinical      | Stool     | VppAsia | CG1 | GCA_001609525.1 | GeneBank |
| A5Z860     | 2005 | Canada: British Columbia | Clinical      | Stool     | VppUS2  | CG5 | GCA_001609615.1 | GeneBank |
| A5Z878     | 2005 | Canada: British Columbia | Clinical      | Stool     | VppX    | CG2 | GCA_001609695.1 | GeneBank |
| A5Z905     | 2005 | Canada: British Columbia | Clinical      | Stool     | VppX    | CG2 | GCA_001609635.1 | GeneBank |
| A5Z924     | 2005 | Canada: British Columbia | Clinical      | Stool     | VppX    | CG2 | GCA_001609675.1 | GeneBank |
| AF91       | 2006 | USA: FL                  | Environmental | NA        | VppAsia |     | GCA_000958595.1 | GeneBank |
| AN-16000   | 1998 | Bangladesh               | Clinical      | NA        | VppAsia | CG1 | SRR5071103      | GeneBank |
| AN-2189    | 1998 | Bangladesh               | Clinical      | NA        | VppAsia | CG1 | SRR5071142      | GeneBank |
| AN-5034    | NA   | NA                       | Environmental | NA        | VppAsia | CG1 | GCA_000182385.1 | GeneBank |
| AO-24491   | 1999 | Bangladesh               | Clinical      | NA        | VppAsia | CG1 | SRR5071106      | GeneBank |
| AP-11243   | 2000 | Bangladesh               | Clinical      | NA        | VppAsia | CG1 | SRR5071144      | GeneBank |
| AQ3810     | NA   | NA                       | Environmental | NA        | VppAsia |     | GCA_000582905.2 | GeneBank |
| ATC220     | 1998 | Chile: Antofagasta       | Clinical      | NA        | VppAsia | CG1 | GCA_001270975.1 | GeneBank |
| ATCC 17802 | 1951 | Japan                    | Environmental | Fish      | VppAsia |     | GCA_001558495.1 | GeneBank |
| B-265      | 2004 | Mozambique               | Clinical      | Stool     | VppAsia | CG1 | GCA_000516875.2 | GeneBank |
| Ba94C2     | 2015 | NA                       | Environmental | Shellfish | VppAsia |     | SRR3987381      | GeneBank |



|             |      |                          |               |       |         |     |                 |          |
|-------------|------|--------------------------|---------------|-------|---------|-----|-----------------|----------|
| BAC-98-3372 | 1998 | USA                      | Clinical      | NA    | VppAsia | CG1 | SRR5071092      | GeneBank |
| BAC-98-3374 | 1998 | USA                      | Clinical      | NA    | VppAsia | CG1 | SRR5071095      | GeneBank |
| BAC-98-4092 | 1998 | USA                      | Clinical      | NA    | VppAsia | CG1 | SRR5071096      | GeneBank |
| BB22OP      | NA   | NA                       | Environmental | NA    | VppAsia | CG3 | GCA_000328405.1 | GeneBank |
| C140        | 2008 | Canada: British Columbia | Clinical      | Stool | VppAsia |     | GCA_001609655.1 | GeneBank |
| C142        | 2008 | Canada: British Columbia | Clinical      | Stool | VppAsia | CG6 | GCA_001609375.1 | GeneBank |
| C143        | 2008 | Canada: British Columbia | Clinical      | Stool | VppX    | CG2 | GCA_001609395.1 | GeneBank |
| C144        | 2008 | Canada: British Columbia | Clinical      | Stool | VppX    | CG2 | GCA_001609415.1 | GeneBank |
| C145        | 2008 | Canada: British Columbia | Clinical      | Stool | VppAsia | CG6 | GCA_001609345.1 | GeneBank |
| C146        | 2008 | Canada: British Columbia | Clinical      | Stool | VppAsia |     | GCA_001609445.1 | GeneBank |
| C147        | 2008 | Canada: British Columbia | Clinical      | Stool | VppX    | CG2 | GCA_001609495.1 | GeneBank |
| C148        | 2008 | Canada: British Columbia | Clinical      | Stool | VppUS2  | CG5 | GCA_001609475.1 | GeneBank |
| C150        | 2008 | Canada: British Columbia | Clinical      | Stool | VppAsia | CG6 | GCA_001601695.1 | GeneBank |
| C21-1262-07 | 2007 | Peru                     | Clinical      | NA    | VppAsia | CG3 | SRR6410782      | GeneBank |
| C4-324-95   | 1995 | Peru                     | Clinical      | NA    | VppAsia | CG3 | SRR6410781      | GeneBank |
| C5-326-95   | 1995 | Peru                     | Clinical      | NA    | VppAsia | CG3 | SRR6410784      | GeneBank |
| C6-267-96   | 1996 | Peru                     | Clinical      | NA    | VppAsia | CG3 | SRR6410783      | GeneBank |
| C7-212-96   | 1996 | Peru                     | Clinical      | NA    | VppAsia | CG3 | SRR6410786      | GeneBank |
| C9-1257-07  | 2007 | Peru                     | Clinical      | NA    | VppAsia | CG3 | SRR6410785      | GeneBank |
| CAIM 1772   | 2005 | Mexico: Sinaloa          | Environmental | NA    | VppAsia |     | GCA_001856105.1 | GeneBank |
| CDC_K4556R  | 2006 | USA: LA                  | Clinical      | Wound | VppAsia |     | GCA_001727365.1 | GeneBank |
| CDC_K4557   | 2006 | USA: LA                  | Clinical      | Stool | VppAsia |     | GCA_000430425.1 | GeneBank |
| CDC_K4558G  | 2006 | USA: LA                  | Clinical      | Wound | VppUS1  |     | GCA_001727735.1 | GeneBank |
| CDC_K4558W  | 2006 | USA: LA                  | Clinical      | Wound | VppX    |     | GCA_001727745.1 | GeneBank |
| CDC_K4588   | 2006 | USA: ME                  | Clinical      | Stool | VppUS2  |     | GCA_001727775.1 | GeneBank |
| CDC_K4636   | 2006 | USA: NY                  | Clinical      | Stool | VppX    |     | GCA_001727805.1 | GeneBank |
| CDC_K4637G  | 2006 | USA: NY                  | Clinical      | Stool | VppAsia | CG1 | GCA_001727815.1 | GeneBank |
| CDC_K4637W  | 2006 | USA: NY                  | Clinical      | Stool | VppAsia | CG1 | GCA_001727825.1 | GeneBank |
| CDC_K4638   | 2006 | USA: NY                  | Clinical      | Stool | VppAsia |     | GCA_001727845.1 | GeneBank |
| CDC_K4639G  | 2006 | USA: NY                  | Clinical      | Stool | VppX    | CG2 | GCA_001727895.1 | GeneBank |
| CDC_K4639W  | 2006 | USA: NY                  | Clinical      | Stool | VppX    | CG2 | GCA_001727885.1 | GeneBank |
| CDC_K4762   | 2006 | USA: VA                  | Clinical      | NA    | VppAsia |     | GCA_001727925.1 | GeneBank |
| CDC_K4763   | 2006 | USA: VA                  | Clinical      | Stool | VppAsia |     | GCA_001727915.1 | GeneBank |
| CDC_K4764D  | 2006 | USA: VA                  | Clinical      | Stool | VppAsia |     | GCA_001727975.1 | GeneBank |

|            |      |         |          |       |         |      |                          |
|------------|------|---------|----------|-------|---------|------|--------------------------|
| CDC_K4764L | 2006 | USA: VA | Clinical | Stool | VppAsia |      | GCA_001727965.1 GeneBank |
| CDC_K4775  | 2007 | USA: GA | Clinical | Stool | VppAsia | CG1  | GCA_001728005.1 GeneBank |
| CDC_K4842  | 2006 | USA: MD | Clinical | Stool | VppAsia |      | GCA_001727995.1 GeneBank |
| CDC_K4857G | 2007 | USA: HI | Clinical | Stool | VppAsia |      | GCA_001728045.1 GeneBank |
| CDC_K4857W | 2007 | USA: HI | Clinical | Stool | VppAsia |      | GCA_001728065.1 GeneBank |
| CDC_K4858  | 2006 | USA: HI | Clinical | Stool | VppAsia |      | GCA_001728085.1 GeneBank |
| CDC_K4859  | 2007 | USA: HI | Clinical | NA    | VppAsia |      | GCA_001728095.1 GeneBank |
| CDC_K4981  | 2007 | USA: OK | Clinical | NA    | VppUS2  |      | GCA_001728125.1 GeneBank |
| CDC_K5009W | 2006 | USA: MA | Clinical | Stool | VppAsia |      | GCA_001728135.1 GeneBank |
| CDC_K5010G | 2006 | USA: MA | Clinical | Stool | VppAsia | CG1  | GCA_001728155.1 GeneBank |
| CDC_K5010W | 2006 | USA: MA | Clinical | Stool | VppAsia | CG1  | GCA_001728175.1 GeneBank |
| CDC_K5058  | 2007 | USA: TX | Clinical | Stool | VppAsia | CG1  | GCA_001728205.1 GeneBank |
| CDC_K5059G | 2007 | USA: TX | Clinical | NA    | VppAsia |      | GCA_001728215.1 GeneBank |
| CDC_K5059W | 2007 | USA: TX | Clinical | NA    | VppAsia |      | GCA_001728235.1 GeneBank |
| CDC_K5067  | 2007 | USA: SD | Clinical | Stool | VppUS2  |      | GCA_001728255.1 GeneBank |
| CDC_K5073  | 2007 | USA: MD | Clinical | Stool | VppUS1  |      | GCA_001728275.1 GeneBank |
| CDC_K5125  | 2007 | USA: MS | Clinical | NA    | VppAsia |      | GCA_001728295.1 GeneBank |
| CDC_K5126  | 2007 | USA: MS | Clinical | Stool | VppUS1  |      | GCA_001728325.1 GeneBank |
| CDC_K5276  | 2007 | USA: NY | Clinical | Stool | VppAsia | CG10 | GCA_001728335.1 GeneBank |
| CDC_K5277  | NA   | USA: WA | Clinical | Stool | VppAsia |      | GCA_001728345.1 GeneBank |
| CDC_K5278  | 2007 | USA: WA | Clinical | Stool | VppX    | CG2  | GCA_001728405.1 GeneBank |
| CDC_K5279  | NA   | USA: WA | Clinical | Stool | VppAsia |      | GCA_001727655.1 GeneBank |
| CDC_K5280  | 2007 | USA: WA | Clinical | Stool | VppX    | CG2  | GCA_001727625.1 GeneBank |
| CDC_K5281  | 2007 | USA: WA | Clinical | Stool | VppX    | CG2  | GCA_001727575.1 GeneBank |
| CDC_K5306  | 2007 | USA: GA | Clinical | Stool | VppUS1  |      | GCA_001727505.1 GeneBank |
| CDC_K5308  | 2007 | USA: AK | Clinical | Stool | VppX    | CG2  | GCA_001727485.1 GeneBank |
| CDC_K5323G | NA   | USA: VA | Clinical | NA    | VppAsia |      | GCA_001727475.1 GeneBank |
| CDC_K5323W | NA   | USA: VA | Clinical | NA    | VppAsia |      | GCA_001727415.1 GeneBank |
| CDC_K5324G | 2007 | USA: VA | Clinical | Stool | VppUS2  |      | GCA_001727395.1 GeneBank |
| CDC_K5324W | 2007 | USA: VA | Clinical | Stool | VppUS2  |      | GCA_001727405.1 GeneBank |
| CDC_K5328  | NA   | USA: IN | Clinical | Stool | VppX    | CG2  | GCA_001727665.1 GeneBank |
| CDC_K5330  | 2007 | USA: TX | Clinical | NA    | VppAsia |      | GCA_001728375.1 GeneBank |
| CDC_K5331  | 2007 | USA: GA | Clinical | Stool | VppAsia | CG3  | GCA_001728425.1 GeneBank |
| CDC_K5345G | 2007 | USA: IA | Clinical | Stool | VppX    | CG2  | GCA_001728465.1 GeneBank |

|             |      |         |               |       |         |      |                          |
|-------------|------|---------|---------------|-------|---------|------|--------------------------|
| CDC_K5345W  | 2007 | USA: IA | Clinical      | Stool | VppX    | CG2  | GCA_001728485.1 GeneBank |
| CDC_K5346   | 2007 | USA: PA | Clinical      | Stool | VppX    | CG2  | GCA_001728415.1 GeneBank |
| CDC_K5428   | 2007 | USA: NV | Clinical      | Stool | VppX    |      | GCA_001727645.1 GeneBank |
| CDC_K5429   | 2007 | USA: NV | Clinical      | Stool | VppX    | CG2  | GCA_001727585.1 GeneBank |
| CDC_K5433   | 2007 | USA: WA | Clinical      | Stool | VppX    | CG2  | GCA_001727385.1 GeneBank |
| CDC_K5435   | 2007 | USA: WA | Clinical      | Stool | VppAsia |      | GCA_001727465.1 GeneBank |
| CDC_K5437   | 2007 | USA: WA | Clinical      | Stool | VppX    | CG2  | GCA_001727565.1 GeneBank |
| CDC_K5438   | 2007 | USA: WA | Clinical      | Stool | VppAsia |      | GCA_001727705.1 GeneBank |
| CDC_K5439   | 2007 | USA: WA | Clinical      | Stool | VppAsia | CG3  | GCA_001728495.1 GeneBank |
| CDC_K5456   | NA   | USA: WA | Clinical      | Stool | VppX    | CG2  | GCA_001728545.1 GeneBank |
| CDC_K5457   | 2007 | USA: WA | Clinical      | Stool | VppX    | CG2  | GCA_001728505.1 GeneBank |
| CDC_K5485   | 2007 | USA: NC | Clinical      | NA    | VppX    | CG8  | GCA_001728565.1 GeneBank |
| CDC_K5512   | 2007 | USA: OK | Clinical      | Stool | VppX    | CG2  | GCA_001728585.1 GeneBank |
| CDC_K5528   | 2007 | USA: GA | Clinical      | Stool | VppAsia | CG1  | GCA_001728625.1 GeneBank |
| CDC_K5579   | NA   | USA: IN | Clinical      | Stool | VppUS2  | CG5  | GCA_001728575.1 GeneBank |
| CDC_K5582   | 2007 | USA: GA | Clinical      | Stool | VppAsia | CG10 | GCA_001728645.1 GeneBank |
| CDC_K5618   | 2007 | USA: NY | Clinical      | NA    | VppX    |      | GCA_001728655.1 GeneBank |
| CDC_K5620   | 2007 | USA: NY | Clinical      | Stool | VppX    |      | GCA_001728665.1 GeneBank |
| CDC_K5629   | 2007 | USA: GA | Clinical      | Stool | VppX    | CG2  | GCA_001728695.1 GeneBank |
| CDC_K5635   | 2007 | USA: MD | Clinical      | Wound | VppX    |      | GCA_001728725.1 GeneBank |
| CDC_K5638   | NA   | USA: MD | Clinical      | Stool | VppX    | CG2  | GCA_001728745.1 GeneBank |
| CDC_K5701   | 2007 | USA: OR | Clinical      | Stool | VppAsia |      | GCA_001728755.1 GeneBank |
| CFSAN001174 | 2004 | USA     | Environmental | NA    | VppX    | CG8  | GCA_001696115.1 GeneBank |
| CFSAN001595 | 1996 | Peru    | Clinical      | NA    | VppAsia | CG3  | GCA_000701045.2 GeneBank |
| CFSAN001611 | 1997 | USA: OR | Environmental | NA    | VppX    | CG2  | GCA_000707045.1 GeneBank |
| CFSAN001612 | 1990 | USA: WA | Clinical      | NA    | VppX    | CG2  | GCA_000706825.1 GeneBank |
| CFSAN001613 | 1997 | USA: WA | Clinical      | NA    | VppX    | CG2  | GCA_000707625.1 GeneBank |
| CFSAN001614 | 2004 | USA: AK | Environmental | NA    | VppX    | CG2  | GCA_000707885.1 GeneBank |
| CFSAN001617 | 1997 | USA: WA | Clinical      | NA    | VppX    | CG8  | GCA_000707245.1 GeneBank |
| CFSAN001618 | 1990 | USA: WA | Clinical      | NA    | VppX    | CG2  | GCA_000707525.1 GeneBank |
| CFSAN001619 | 1988 | USA: WA | Environmental | NA    | VppX    | CG2  | GCA_000707545.1 GeneBank |
| CFSAN001620 | 1998 | USA: NY | Environmental | NA    | VppX    | CG2  | GCA_000707565.1 GeneBank |
| CFSAN006130 | 2013 | USA: MD | Clinical      | Stool | VppX    | CG2  | GCA_000706925.1 GeneBank |
| CFSAN006131 | 2013 | USA: MD | Clinical      | Stool | VppX    | CG2  | GCA_000707325.1 GeneBank |

|             |      |         |               |           |         |      |                          |
|-------------|------|---------|---------------|-----------|---------|------|--------------------------|
| CFSAN006132 | 2013 | USA: MD | Clinical      | Stool     | VppX    | CG2  | GCA_000707845.1 GeneBank |
| CFSAN006133 | 2013 | USA: MD | Clinical      | Stool     | VppX    | CG2  | GCA_000707865.1 GeneBank |
| CFSAN006134 | 2013 | USA: MD | Clinical      | Stool     | VppX    | CG2  | GCA_000706845.1 GeneBank |
| CFSAN007429 | 2012 | USA: MD | Clinical      | Stool     | VppAsia | CG10 | GCA_000707405.1 GeneBank |
| CFSAN007430 | 2012 | USA: MD | Clinical      | Stool     | VppAsia | CG10 | GCA_000707425.1 GeneBank |
| CFSAN007431 | 2012 | USA: MD | Clinical      | Stool     | VppAsia | CG10 | GCA_000707385.1 GeneBank |
| CFSAN007432 | 2013 | USA: MD | Clinical      | Stool     | VppAsia | CG10 | GCA_000707445.1 GeneBank |
| CFSAN007434 | 2013 | USA: MD | Clinical      | Stool     | VppAsia | CG10 | GCA_000707485.1 GeneBank |
| CFSAN007436 | 2013 | USA: MD | Clinical      | Stool     | VppAsia | CG10 | GCA_000706885.1 GeneBank |
| CFSAN007437 | 2012 | USA: MD | Clinical      | Stool     | VppX    |      | GCA_000707165.1 GeneBank |
| CFSAN007438 | 2012 | USA: MD | Clinical      | Wound     | VppAsia |      | GCA_000707145.1 GeneBank |
| CFSAN007439 | 2012 | USA: DE | Clinical      | Stool     | VppUS1  |      | GCA_000707025.1 GeneBank |
| CFSAN007440 | 2013 | USA: MD | Clinical      | Stool     | VppUS1  |      | GCA_000707005.1 GeneBank |
| CFSAN007441 | 2012 | USA: MD | Clinical      | Wound     | VppUS1  |      | GCA_000706945.1 GeneBank |
| CFSAN007442 | 2012 | USA: MD | Clinical      | Stool     | VppUS1  |      | GCA_000707305.1 GeneBank |
| CFSAN007443 | 2012 | USA: MD | Clinical      | Others    | VppUS1  |      | GCA_000707105.1 GeneBank |
| CFSAN007444 | 2012 | USA: MD | Clinical      | Wound     | VppAsia |      | GCA_000707065.1 GeneBank |
| CFSAN007445 | 2012 | USA: MD | Clinical      | Stool     | VppUS2  | CG5  | GCA_000707125.1 GeneBank |
| CFSAN007446 | 2012 | USA: MD | Clinical      | Wound     | VppAsia |      | GCA_000707685.1 GeneBank |
| CFSAN007447 | 2012 | USA: MD | Clinical      | Others    | VppAsia |      | GCA_000707705.1 GeneBank |
| CFSAN007448 | 2012 | USA: PA | Clinical      | Wound     | VppAsia |      | GCA_000707725.1 GeneBank |
| CFSAN007449 | 2012 | USA: MD | Clinical      | Stool     | VppAsia | CG1  | GCA_000707745.2 GeneBank |
| CFSAN007450 | 2012 | USA: MD | Clinical      | Stool     | VppAsia | CG1  | GCA_000707765.2 GeneBank |
| CFSAN007451 | 2012 | USA: MD | Clinical      | Stool     | VppAsia | CG1  | GCA_000707805.2 GeneBank |
| CFSAN007452 | 2010 | USA: MD | Clinical      | Stool     | VppAsia |      | GCA_000707785.2 GeneBank |
| CFSAN007453 | 2010 | USA: MD | Clinical      | Stool     | VppAsia |      | GCA_000707825.2 GeneBank |
| CFSAN007454 | 2010 | USA: MD | Environmental | Shellfish | VppAsia |      | GCA_000707905.2 GeneBank |
| CFSAN007455 | 2013 | USA: MD | Clinical      | Stool     | VppX    |      | GCA_000706985.1 GeneBank |
| CFSAN007456 | 2010 | USA: MD | Environmental | Shellfish | VppAsia |      | GCA_000707285.2 GeneBank |
| CFSAN007457 | 2010 | USA: MD | Environmental | Shellfish | VppX    |      | GCA_000707085.2 GeneBank |
| CFSAN007458 | 2010 | USA: MD | Environmental | Shellfish | VppUS1  |      | GCA_000707365.2 GeneBank |
| CFSAN007459 | 2010 | USA: MD | Environmental | Shellfish | VppX    |      | GCA_000707185.2 GeneBank |
| CFSAN007460 | 2013 | USA: MD | Clinical      | Stool     | VppX    | CG2  | GCA_000706965.1 GeneBank |
| CFSAN007461 | 2013 | USA: MD | Clinical      | Stool     | VppX    | CG2  | GCA_000707205.1 GeneBank |

|             |      |         |               |           |         |     |                          |
|-------------|------|---------|---------------|-----------|---------|-----|--------------------------|
| CFSAN012491 | 2010 | USA: MD | Environmental | Shellfish | VppAsia |     | GCA_000707645.2 GeneBank |
| CFSAN012492 | 2010 | USA: MD | Environmental | Shellfish | VppAsia |     | GCA_000707665.2 GeneBank |
| CFSAN012493 | 2010 | USA: MD | Environmental | Shellfish | VppAsia |     | GCA_000707265.2 GeneBank |
| CFSAN012494 | 2010 | USA: MD | Environmental | Shellfish | VppAsia |     | GCA_000707345.2 GeneBank |
| CFSAN018752 | 1998 | Spain   | Clinical      | Stool     | VppAsia |     | GCA_001695955.1 GeneBank |
| CFSAN018753 | 1999 | Spain   | Clinical      | Stool     | VppAsia |     | GCA_001695995.1 GeneBank |
| CFSAN018754 | 2004 | Spain   | Clinical      | Stool     | VppAsia | CG1 | GCA_001695945.1 GeneBank |
| CFSAN018755 | 2002 | Spain   | Environmental | NA        | VppAsia |     | GCA_001695935.1 GeneBank |
| CFSAN018756 | 2003 | Spain   | Environmental | NA        | VppAsia |     | GCA_001696005.1 GeneBank |
| CFSAN018757 | 1997 | Peru    | Clinical      | Stool     | VppAsia | CG1 | GCA_001696015.1 GeneBank |
| CFSAN018758 | 1999 | Peru    | Clinical      | Stool     | VppAsia |     | GCA_001696055.1 GeneBank |
| CFSAN018760 | 2004 | USA     | Environmental | NA        | VppUS1  |     | GCA_001696085.1 GeneBank |
| CFSAN018761 | 2004 | USA     | Environmental | NA        | VppAsia |     | GCA_001696065.1 GeneBank |
| CFSAN018762 | 2004 | USA     | Environmental | NA        | VppAsia |     | GCA_001696155.1 GeneBank |
| CFSAN018763 | 2004 | USA     | Environmental | NA        | VppUS2  | CG5 | GCA_001696135.1 GeneBank |
| CFSAN018764 | 2004 | USA     | Environmental | NA        | VppX    |     | GCA_001696145.1 GeneBank |
| CFSAN018765 | 2004 | USA     | Environmental | NA        | VppX    |     | GCA_001696165.1 GeneBank |
| CFSAN018766 | 2004 | USA     | Environmental | NA        | VppAsia |     | GCA_001696215.1 GeneBank |
| CFSAN018767 | 2004 | USA     | Environmental | NA        | VppUS2  |     | GCA_001696225.1 GeneBank |
| CFSAN025052 | 2009 | Peru    | Environmental | NA        | VppAsia | CG4 | GCA_001634135.1 GeneBank |
| CFSAN025053 | 2009 | Peru    | Clinical      | NA        | VppAsia | CG4 | GCA_001634165.1 GeneBank |
| CFSAN025054 | 2009 | Peru    | Clinical      | NA        | VppAsia | CG4 | GCA_001634105.1 GeneBank |
| CFSAN025055 | 2009 | Peru    | Clinical      | NA        | VppAsia | CG4 | GCA_001634125.1 GeneBank |
| CFSAN025056 | 2009 | Peru    | Clinical      | NA        | VppAsia | CG4 | GCA_001634185.1 GeneBank |
| CFSAN025057 | 2009 | Peru    | Clinical      | NA        | VppAsia | CG4 | GCA_001634205.1 GeneBank |
| CFSAN025058 | 2009 | Peru    | Clinical      | NA        | VppAsia | CG4 | GCA_001634215.1 GeneBank |
| CFSAN025059 | 2009 | Peru    | Clinical      | NA        | VppAsia | CG4 | GCA_001633985.1 GeneBank |
| CFSAN025060 | 2009 | Peru    | Clinical      | NA        | VppAsia | CG4 | GCA_001634015.1 GeneBank |
| CFSAN025061 | 2009 | Peru    | Clinical      | NA        | VppAsia | CG4 | GCA_001634245.1 GeneBank |
| CFSAN025062 | 2009 | Peru    | Clinical      | NA        | VppAsia | CG4 | GCA_001633825.1 GeneBank |
| CFSAN025063 | 2009 | Peru    | Clinical      | NA        | VppAsia | CG4 | GCA_001633845.1 GeneBank |
| CFSAN025064 | 2009 | Peru    | Clinical      | NA        | VppAsia | CG4 | GCA_001633995.1 GeneBank |
| CFSAN025065 | 2009 | Peru    | Clinical      | NA        | VppAsia | CG4 | GCA_001633835.1 GeneBank |
| CFSAN025066 | 2009 | Peru    | Clinical      | NA        | VppAsia | CG4 | GCA_001633855.1 GeneBank |

|                    |      |                          |               |           |         |      |                          |
|--------------------|------|--------------------------|---------------|-----------|---------|------|--------------------------|
| CFSAN025067        | 2009 | Peru                     | Clinical      | NA        | VppAsia | CG4  | GCA_001633905.1 GeneBank |
| CFSAN025068        | 2009 | Peru                     | Clinical      | NA        | VppAsia | CG4  | GCA_001633915.1 GeneBank |
| CFSAN029653        | 2009 | Peru                     | Clinical      | NA        | VppAsia | CG4  | GCA_001633935.1 GeneBank |
| CFSAN029654        | 2009 | Peru                     | Clinical      | NA        | VppAsia | CG4  | GCA_001633955.1 GeneBank |
| CFSAN029656        | 2009 | Peru                     | Clinical      | NA        | VppAsia | CG4  | GCA_001634035.1 GeneBank |
| CFSAN045068-118    | 2015 | Spain: Galicia           | Clinical      | NA        | VppAsia |      | SRR5163839 GeneBank      |
| CFSAN045069-119    | 2015 | Spain: Galicia           | Clinical      | NA        | VppAsia |      | SRR5163836 GeneBank      |
| CFSAN045070-113477 | 2015 | Spain: Galicia           | Clinical      | NA        | VppAsia |      | SRR5163834 GeneBank      |
| CFSAN056086        | 2016 | Spain: Galicia           | Clinical      | NA        | VppAsia | CG1  | SRR5163849 GeneBank      |
| CFSAN056088        | 2016 | Spain: Galicia           | Clinical      | NA        | VppAsia |      | SRR5163835 GeneBank      |
| CHN25              | 2011 | China: Shanghai          | Environmental | NA        | VppAsia |      | GCA_001700835.1 GeneBank |
| CT4287             | 2013 | NA                       | Environmental | Shellfish | VppAsia |      | GCA_001023125.1 GeneBank |
| EKP-008            | NA   | NA                       | Environmental | NA        | VppAsia |      | GCA_000510585.2 GeneBank |
| EKP-021            | NA   | NA                       | Environmental | NA        | VppAsia | CG1  | GCA_000571915.2 GeneBank |
| EKP-026            | 2008 | Bangladesh               | Environmental | Water     | VppAsia | CG1  | GCA_000525005.2 GeneBank |
| EKP-028            | 2008 | Bangladesh               | Environmental | Water     | VppAsia | CG1  | GCA_000522005.2 GeneBank |
| EN2910             | 2000 | USA: WA                  | Clinical      | Stool     | VppX    | CG2  | GCA_000877685.1 GeneBank |
| EN9701072          | 1997 | USA: WA                  | Clinical      | Stool     | VppUS2  | CG5  | GCA_000877715.1 GeneBank |
| EN9701121          | 1997 | USA: WA                  | Clinical      | Stool     | VppX    | CG8  | GCA_000877725.1 GeneBank |
| EN9701173          | 1997 | USA: WA                  | Clinical      | Stool     | VppX    | CG2  | GCA_000877555.1 GeneBank |
| EN9901310          | 1999 | USA: WA                  | Clinical      | Stool     | VppX    | CG2  | GCA_000877565.1 GeneBank |
| F1419              | 2006 | Canada: British Columbia | Clinical      | Stool     | VppUS2  | CG5  | GCA_001608915.1 GeneBank |
| F30368             | 2006 | Canada: British Columbia | Clinical      | Stool     | VppAsia | CG13 | GCA_001608815.1 GeneBank |
| F3305-VP           | 2005 | UK: Norfolk              | Clinical      | NA        | VppAsia |      | SRR5639917 GeneBank      |
| F4395              | 2006 | Canada: British Columbia | Clinical      | Stool     | VppX    | CG2  | GCA_001608685.1 GeneBank |
| F63267             | 2006 | Canada: British Columbia | Clinical      | Stool     | VppAsia | CG1  | GCA_001608835.1 GeneBank |
| FDA_R31            | 2007 | USA: LA                  | Environmental | Shellfish | VppUS2  |      | GCA_000430405.1 GeneBank |
| FIM-S1392-         | 2014 | Mexico: Hermosillo       | Environmental | Sediment  | VppAsia |      | GCA_000732995.1 GeneBank |
| FORC_004           | 2014 | SouthKorea: Busan        | Environmental | Water     | VppX    |      | GCA_001433415.1 GeneBank |
| FORC_006           | 2014 | SouthKorea: Gyeongnam    | Environmental | Others    | VppAsia |      | GCA_001304775.1 GeneBank |
| FORC_008           | 2014 | SouthKorea: Gyeongnam    | Environmental | Fish      | VppAsia |      | GCA_001244315.1 GeneBank |
| FORC_014           | 2015 | SouthKorea: Pusan        | Environmental | NA        | VppAsia |      | GCA_001636035.1 GeneBank |
| FORC_018           | NA   | SouthKorea               | Environmental | Fish      | VppAsia |      | GCA_001887055.1 GeneBank |
| FORC_022           | NA   | SouthKorea               | Environmental | Shellfish | VppAsia |      | GCA_001879585.1 GeneBank |

|           |      |                   |               |           |         |     |                          |
|-----------|------|-------------------|---------------|-----------|---------|-----|--------------------------|
| FORC_023  | 2014 | SouthKorea: Pusan | Clinical      | Others    | VppAsia |     | GCA_001758605.1 GeneBank |
| G25       | 2012 | Spain: Galicia    | Clinical      | NA        | VppX    | CG2 | GCA_002198475.1 GeneBank |
| G30       | 2012 | Spain: Galicia    | Clinical      | NA        | VppX    | CG2 | GCA_002198555.1 GeneBank |
| G31       | 2012 | Spain: Galicia    | Clinical      | NA        | VppX    | CG2 | GCA_002198565.1 GeneBank |
| G32       | 2012 | Spain: Galicia    | Clinical      | NA        | VppAsia |     | SRR5163840 GeneBank      |
| G35       | 2012 | Spain: Galicia    | Clinical      | NA        | VppX    | CG2 | GCA_002198615.1 GeneBank |
| G36       | 2012 | Spain: Galicia    | Clinical      | NA        | VppX    | CG2 | GCA_002198575.1 GeneBank |
| G37       | 2012 | Spain: Galicia    | Clinical      | NA        | VppX    | CG2 | GCA_002198445.1 GeneBank |
| GCSL_R10  | 2007 | USA: FL           | Environmental | Shellfish | VppUS2  |     | GCA_001726175.1 GeneBank |
| GCSL_R108 | 2007 | Canada: PEI       | Environmental | Shellfish | VppAsia |     | GCA_001726975.1 GeneBank |
| GCSL_R109 | 2007 | Canada: PEI       | Environmental | Shellfish | VppAsia |     | GCA_001727025.1 GeneBank |
| GCSL_R110 | 2007 | Canada: PEI       | Environmental | Shellfish | VppAsia |     | GCA_001727055.1 GeneBank |
| GCSL_R111 | 2007 | Canada: PEI       | Environmental | Shellfish | VppUS1  |     | GCA_001727065.1 GeneBank |
| GCSL_R12  | 2007 | USA: LA           | Environmental | Shellfish | VppUS1  |     | GCA_001726245.1 GeneBank |
| GCSL_R125 | 2007 | USA: FL           | Environmental | Shellfish | VppUS2  |     | GCA_001727045.1 GeneBank |
| GCSL_R126 | 2007 | USA: FL           | Environmental | Shellfish | VppAsia |     | GCA_001727105.1 GeneBank |
| GCSL_R129 | 2007 | USA: FL           | Environmental | Shellfish | VppUS2  |     | GCA_001727115.1 GeneBank |
| GCSL_R13  | 2007 | USA: LA           | Environmental | Shellfish | VppAsia |     | GCA_001726255.1 GeneBank |
| GCSL_R130 | 2007 | USA: FL           | Environmental | Shellfish | VppAsia |     | GCA_001975475.1 GeneBank |
| GCSL_R131 | 2007 | USA: FL           | Environmental | Shellfish | VppX    |     | GCA_001727125.1 GeneBank |
| GCSL_R135 | 2007 | USA: SC           | Environmental | Shellfish | VppAsia |     | GCA_001727155.1 GeneBank |
| GCSL_R136 | 2007 | USA: SC           | Environmental | Shellfish | VppUS2  |     | GCA_001727185.1 GeneBank |
| GCSL_R137 | 2007 | USA: SC           | Environmental | Shellfish | VppUS2  |     | GCA_001727195.1 GeneBank |
| GCSL_R138 | 2007 | USA: SC           | Environmental | Shellfish | VppUS2  |     | GCA_001727205.1 GeneBank |
| GCSL_R143 | 2007 | USA: FL           | Environmental | Shellfish | VppUS1  |     | GCA_001727265.1 GeneBank |
| GCSL_R144 | 2007 | USA: FL           | Environmental | Shellfish | VppUS1  |     | GCA_001727275.1 GeneBank |
| GCSL_R145 | 2007 | USA: FL           | Environmental | Shellfish | VppUS1  |     | GCA_001727295.1 GeneBank |
| GCSL_R146 | 2007 | USA: FL           | Environmental | Shellfish | VppUS1  |     | GCA_001727245.1 GeneBank |
| GCSL_R149 | 2007 | USA: FL           | Environmental | Shellfish | VppUS2  |     | GCA_001727305.1 GeneBank |
| GCSL_R150 | 2007 | USA: FL           | Environmental | Shellfish | VppUS2  |     | GCA_001727345.1 GeneBank |
| GCSL_R16  | 2007 | USA: FL           | Environmental | Shellfish | VppUS1  |     | GCA_001726345.1 GeneBank |
| GCSL_R17  | 2007 | USA: FL           | Environmental | Shellfish | VppAsia |     | GCA_001726275.1 GeneBank |
| GCSL_R21  | 2007 | USA: TX           | Environmental | Shellfish | VppAsia |     | GCA_001726355.1 GeneBank |
| GCSL_R26  | 2007 | USA: NJ           | Environmental | Shellfish | VppUS1  |     | GCA_001726335.1 GeneBank |

|          |      |             |               |           |         |                          |
|----------|------|-------------|---------------|-----------|---------|--------------------------|
| GCSL_R29 | 2007 | USA: FL     | Environmental | Shellfish | VppUS1  | GCA_001726325.1 GeneBank |
| GCSL_R30 | 2007 | USA: FL     | Environmental | Shellfish | VppUS2  | GCA_001726405.1 GeneBank |
| GCSL_R31 | 2007 | USA: LA     | Environmental | Shellfish | VppUS2  | GCA_001726415.1 GeneBank |
| GCSL_R32 | 2007 | USA: LA     | Environmental | Shellfish | VppUS2  | GCA_001726445.1 GeneBank |
| GCSL_R33 | 2007 | USA: LA     | Environmental | Shellfish | Hybrid  | GCA_001726435.1 GeneBank |
| GCSL_R42 | 2007 | USA: WA     | Environmental | Shellfish | VppUS1  | GCA_001726485.1 GeneBank |
| GCSL_R45 | 2007 | USA: WA     | Environmental | Shellfish | VppUS1  | GCA_001726495.1 GeneBank |
| GCSL_R47 | 2007 | USA: AL     | Environmental | Shellfish | VppUS1  | GCA_001726515.1 GeneBank |
| GCSL_R5  | 2007 | USA: TX     | Environmental | Shellfish | VppAsia | GCA_001726165.1 GeneBank |
| GCSL_R51 | 2007 | USA: AL     | Environmental | Shellfish | VppAsia | GCA_001726535.1 GeneBank |
| GCSL_R52 | 2007 | USA: WA     | Environmental | Shellfish | VppAsia | GCA_001726565.1 GeneBank |
| GCSL_R53 | 2007 | USA: WA     | Environmental | Shellfish | VppAsia | GCA_001726575.1 GeneBank |
| GCSL_R54 | 2007 | USA: WA     | Environmental | Shellfish | VppAsia | GCA_001726595.1 GeneBank |
| GCSL_R55 | 2007 | USA: WA     | Environmental | Shellfish | VppAsia | GCA_001726615.1 GeneBank |
| GCSL_R56 | 2007 | USA: WA     | Environmental | Shellfish | VppAsia | GCA_001726655.1 GeneBank |
| GCSL_R57 | 2007 | USA: WA     | Environmental | Shellfish | Hybrid  | GCA_001726645.1 GeneBank |
| GCSL_R59 | 2007 | USA: ME     | Environmental | Shellfish | VppUS1  | GCA_001726685.1 GeneBank |
| GCSL_R6  | 2007 | USA: TX     | Environmental | Shellfish | VppAsia | GCA_001726265.1 GeneBank |
| GCSL_R60 | 2007 | USA: ME     | Environmental | Shellfish | VppAsia | GCA_001726695.1 GeneBank |
| GCSL_R62 | 2007 | USA: ME     | Environmental | Shellfish | VppUS2  | GCA_001726725.1 GeneBank |
| GCSL_R63 | 2007 | USA: ME     | Environmental | Shellfish | VppAsia | GCA_001726735.1 GeneBank |
| GCSL_R65 | 2007 | USA: ME     | Environmental | Shellfish | VppUS2  | GCA_001726755.1 GeneBank |
| GCSL_R7  | 2007 | USA: TX     | Environmental | Shellfish | VppX    | GCA_001726195.1 GeneBank |
| GCSL_R74 | 2007 | USA: VA     | Environmental | Shellfish | VppAsia | GCA_001726775.1 GeneBank |
| GCSL_R75 | 2007 | USA: VA     | Environmental | Shellfish | VppAsia | GCA_001726805.1 GeneBank |
| GCSL_R76 | 2007 | USA: VA     | Environmental | Shellfish | VppAsia | GCA_001726815.1 GeneBank |
| GCSL_R77 | 2007 | USA: VA     | Environmental | Shellfish | VppAsia | GCA_001726845.1 GeneBank |
| GCSL_R8  | 2007 | USA: TX     | Environmental | Shellfish | VppX    | GCA_001726185.1 GeneBank |
| GCSL_R86 | 2007 | USA: FL     | Environmental | Shellfish | VppUS1  | GCA_001726885.1 GeneBank |
| GCSL_R87 | 2007 | USA: FL     | Environmental | Shellfish | VppAsia | GCA_001726855.1 GeneBank |
| GCSL_R88 | 2007 | USA: FL     | Environmental | Shellfish | VppAsia | GCA_001726895.1 GeneBank |
| GCSL_R95 | 2007 | Canada: PEI | Environmental | Shellfish | VppAsia | GCA_001726915.1 GeneBank |
| GCSL_R96 | 2007 | Canada: PEI | Environmental | Shellfish | VppUS1  | GCA_001726935.1 GeneBank |
| GCSL_R98 | 2007 | Canada: PEI | Environmental | Shellfish | VppAsia | GCA_001726965.1 GeneBank |



|                   |      |                          |               |           |         |      |                          |
|-------------------|------|--------------------------|---------------|-----------|---------|------|--------------------------|
| GCSL_R99          | 2007 | Canada: PEI              | Environmental | Shellfish | VppAsia |      | GCA_001726985.1 GeneBank |
| GIMxtf283-2012.12 | 2012 | China: Shenzhen          | Environmental | Shellfish | VppAsia |      | GCA_001913695.1 GeneBank |
| GIMxtf381-2013.06 | 2013 | China: Haikou            | Environmental | Fish      | VppAsia |      | GCA_001913785.1 GeneBank |
| GIMxtfL61-2011.05 | 2011 | China: Shenzhen          | Clinical      | Stool     | VppAsia | CG1  | GCA_001913735.1 GeneBank |
| GIMxtfL65-2011.05 | 2011 | China: Shenzhen          | Clinical      | Stool     | VppAsia | CG1  | GCA_001913745.1 GeneBank |
| GIMxtfL71-2011.05 | 2011 | China: Shenzhen          | Clinical      | Stool     | VppAsia | CG13 | GCA_001913775.1 GeneBank |
| GIMxtfL88-2011.05 | 2011 | China: Shenzhen          | Clinical      | Stool     | VppAsia |      | GCA_001921805.1 GeneBank |
| Gxw_7004          | 2007 | China: Guangxi           | Clinical      | Stool     | VppAsia | CG1  | GCA_001541615.1 GeneBank |
| Gxw_9143          | 2009 | China: Guangxi           | Clinical      | Stool     | VppAsia | CG3  | GCA_001541625.1 GeneBank |
| H11523            | 2006 | Canada: British Columbia | Clinical      | Stool     | VppX    | CG2  | GCA_001608595.1 GeneBank |
| H18983            | 2006 | Canada: British Columbia | Clinical      | Stool     | VppX    | CG2  | GCA_001608895.1 GeneBank |
| H64024            | 2006 | Canada: British Columbia | Clinical      | Stool     | VppX    | CG2  | GCA_001608615.1 GeneBank |
| HS-13-1           | 2014 | Canada                   | Environmental | Shellfish | VppAsia |      | GCA_001270125.1 GeneBank |
| IDH02189          | 2009 | India                    | Clinical      | Stool     | VppAsia | CG1  | GCA_000522025.2 GeneBank |
| IDH02640          | 2009 | India                    | Clinical      | Stool     | VppAsia | CG1  | GCA_000521825.2 GeneBank |
| ISF-01-07         | 2010 | Canada                   | Environmental | Shellfish | VppAsia | CG3  | GCA_001267555.1 GeneBank |
| ISF-25-6          | 2010 | Canada                   | Environmental | Shellfish | VppX    |      | GCA_001267595.1 GeneBank |
| ISF-29-3          | 2011 | Canada                   | Environmental | Shellfish | VppAsia |      | GCA_001273575.1 GeneBank |
| ISF-54-12         | 2011 | Canada                   | Environmental | Shellfish | VppUS2  |      | GCA_001280635.1 GeneBank |
| ISF-77-01         | 2011 | Canada                   | Environmental | Shellfish | VppAsia |      | GCA_001270285.1 GeneBank |
| ISF-94-1          | 2011 | Canada                   | Environmental | Shellfish | VppAsia |      | GCA_001280645.1 GeneBank |
| J-C2-34           | 1998 | USA: NC                  | Environmental | NA        | VppUS2  |      | GCA_000958655.1 GeneBank |
| K1198             | 2004 | USA: AK                  | Environmental | NA        | VppX    | CG2  | GCA_001188035.1 GeneBank |
| K1275             | 2004 | USA: TX                  | Clinical      | NA        | VppAsia |      | GCA_000958585.1 GeneBank |
| K1461             | 2004 | USA: MA                  | Clinical      | NA        | VppX    | CG2  | GCA_000958575.1 GeneBank |
| K23               | 2013 | India                    | Environmental | Others    | VppAsia |      | GCA_001497485.1 GeneBank |
| Klin              | 2010 | Sweden                   | Clinical      | Stool     | VppAsia | CG1  | GCA_001720365.1 GeneBank |
| KVp10             | 2007 | Sweden                   | Environmental | NA        | VppUS2  |      | GCA_001707995.1 GeneBank |
| KXV-641           | 1998 | Japan                    | Clinical      | NA        | VppAsia | CG1  | SRR5071140 GeneBank      |
| M0605             | 2013 | Mexico: Sinaloa          | Environmental | Shellfish | VppX    |      | GCA_000523375.1 GeneBank |
| M59787            | 2006 | Canada: British Columbia | Clinical      | Stool     | VppX    | CG2  | GCA_001608545.1 GeneBank |
| MAVP-26           | 2013 | NA                       | Clinical      | NA        | VppX    | CG2  | GCA_001023055.1 GeneBank |
| MAVP-36           | 2013 | NA                       | Clinical      | NA        | VppX    | CG2  | GCA_001023105.1 GeneBank |
| MAVP-45           | 2013 | NA                       | Clinical      | NA        | VppX    | CG2  | GCA_001007535.1 GeneBank |

|             |      |                           |               |           |         |      |                 |          |
|-------------|------|---------------------------|---------------|-----------|---------|------|-----------------|----------|
| MAVP-E      | NA   | NA                        | Clinical      | NA        | VppAsia | CG10 | GCA_001007525.1 | GeneBank |
| MAVP-M      | 2011 | NA                        | Clinical      | NA        | VppAsia |      | GCA_001023155.1 | GeneBank |
| MAVP-V      | 2011 | NA                        | Clinical      | NA        | VppX    | CG2  | GCA_001007545.1 | GeneBank |
| MVP1        | 2016 | Malaysia: Negeri Sembilan | Environmental | NA        | VppAsia |      | GCA_001996365.1 | GeneBank |
| N310        | 2016 | Spain: Galicia            | Clinical      | NA        | VppAsia |      | SRR5163837      | GeneBank |
| N314        | 2016 | Spain: Galicia            | Clinical      | NA        | VppAsia | CG1  | SRR5163842      | GeneBank |
| NBRC 12711  | NA   | Japan                     | Environmental | NA        | VppAsia |      | GCA_000813305.1 | GeneBank |
| NCKU_CV_CHN | 2010 | China                     | Environmental | Shellfish | VppX    |      | GCA_000736325.1 | GeneBank |
| NCKU_TN_S02 | 2008 | Thailand                  | Environmental | Sediment  | VppAsia |      | GCA_000736345.1 | GeneBank |
| NCKU_TV_3HP | 1999 | Thailand                  | Environmental | Shellfish | VppAsia |      | GCA_000736335.1 | GeneBank |
| NCKU_TV_5HP | 1999 | Thailand                  | Environmental | Shellfish | VppAsia |      | GCA_000736315.1 | GeneBank |
| NIHCB0603   | NA   | NA                        | Environmental | NA        | VppAsia | CG1  | GCA_000454265.1 | GeneBank |
| NIHCB0757   | NA   | NA                        | Environmental | NA        | VppAsia |      | GCA_000477475.1 | GeneBank |
| NSV 5736    | NA   | USA                       | Clinical      | NA        | VppX    | CG8  | GCA_001471485.1 | GeneBank |
| OAG100      | 2007 | Spain                     | Environmental | NA        | VppAsia |      | SRR5163838      | GeneBank |
| OAG95       | 2007 | Spain                     | Environmental | NA        | VppX    |      | SRR5163851      | GeneBank |
| OAG99       | 2007 | Spain                     | Environmental | NA        | VppAsia |      | SRR5163852      | GeneBank |
| OJL90-2nd   | 2007 | Spain                     | Environmental | NA        | VppAsia |      | SRR6410788      | GeneBank |
| P682        | 2009 | Peru                      | Environmental | Shellfish | VppAsia | CG1  | SRR6410787      | GeneBank |
| P729        | 2009 | Peru                      | Environmental | Shellfish | VppAsia | CG1  | SRR6410790      | GeneBank |
| P860        | 2009 | Peru                      | Environmental | Shellfish | VppAsia | CG1  | SRR6410789      | GeneBank |
| PCV08-7     | 2008 | Malaysia: Selangor        | Environmental | Others    | VppAsia |      | GCA_000347495.1 | GeneBank |
| Peru-288    | 2001 | Peru                      | Clinical      | Stool     | VppAsia | CG1  | GCA_000522065.2 | GeneBank |
| PH157       | NA   | Spain                     | Environmental | NA        | VppAsia |      | ERR779913       | GeneBank |
| PMA109.5    | 2005 | Chile: Puerto Montt       | Environmental | NA        | VppAsia | CG1  | GCA_001270805.1 | GeneBank |
| PMA-109-5   | 2005 | Chile                     | Environmental | NA        | VppAsia | CG1  | SRR5071138      | GeneBank |
| PMA37.5     | 2005 | Chile: Puerto Montt       | Environmental | NA        | VppAsia | CG1  | GCA_001270835.1 | GeneBank |
| PMA-37-5    | 2005 | Chile                     | Environmental | NA        | VppAsia | CG1  | SRR5071132      | GeneBank |
| PMC14.7     | 2007 | Chile: Puerto Montt       | Clinical      | Stool     | VppAsia | CG1  | GCA_001270895.1 | GeneBank |
| PMC48       | 2004 | Chile: Puerto Montt       | Clinical      | Stool     | VppAsia | CG1  | GCA_001270905.1 | GeneBank |
| PMC58.5     | 2005 | Chile: Puerto Montt       | Clinical      | Stool     | VppAsia | CG1  | GCA_001270815.1 | GeneBank |
| PMC58.7     | 2007 | Chile: Puerto Montt       | Clinical      | Stool     | VppAsia | CG1  | GCA_001270825.1 | GeneBank |
| PQ110-2nd   | 2006 | Spain                     | Environmental | NA        | VppAsia |      | SRR6410791      | GeneBank |
| PY194       | 2007 | Spain                     | Environmental | NA        | VppX    |      | SRR5163847      | GeneBank |

|              |      |                  |               |           |         |      |                 |          |
|--------------|------|------------------|---------------|-----------|---------|------|-----------------|----------|
| PY233        | 2006 | Spain            | Environmental | NA        | VppAsia |      | SRR5163844      | GeneBank |
| PY350        | 2006 | Spain            | Environmental | NA        | VppAsia |      | SRR5163841      | GeneBank |
| PY452        | 2007 | Spain            | Environmental | NA        | VppAsia |      | SRR5163845      | GeneBank |
| PY456        | 2006 | Spain            | Environmental | NA        | VppAsia |      | SRR5163843      | GeneBank |
| R10B2_71     | 1997 | USA: WA          | Environmental | Shellfish | VppUS2  |      | GCA_001704915.1 | GeneBank |
| RIMD 2210633 | 1996 | Japan            | Clinical      | Stool     | VppAsia | CG1  | GCA_000196095.1 | GeneBank |
| RM-13-3      | 2015 | Canada           | Environmental | Shellfish | VppAsia |      | GCA_001267965.1 | GeneBank |
| RM-14-5      | 2014 | Canada           | Environmental | Shellfish | VppUS1  |      | GCA_001273555.1 | GeneBank |
| RM-17-6      | 2015 | Canada           | Environmental | Shellfish | VppX    |      | GCA_001267655.1 | GeneBank |
| S001         | NA   | Thailand         | Clinical      | NA        | VppAsia |      | GCA_000492095.1 | GeneBank |
| S002         | 1999 | China: Taiwan    | Clinical      | NA        | VppAsia |      | GCA_000492075.1 | GeneBank |
| S003         | NA   | China: Hong Kong | Clinical      | NA        | VppAsia | CG12 | GCA_000492055.1 | GeneBank |
| S004         | 1985 | Maldives         | Clinical      | NA        | VppAsia | CG12 | GCA_000492035.1 | GeneBank |
| S005         | NA   | Thailand         | Clinical      | NA        | VppAsia | CG12 | GCA_000492015.1 | GeneBank |
| S008         | 1987 | Thailand         | Clinical      | NA        | VppAsia | CG12 | GCA_000491995.1 | GeneBank |
| S009         | 1987 | Thailand         | Clinical      | NA        | VppAsia | CG12 | GCA_000491975.1 | GeneBank |
| S011         | 1990 | Thailand         | Clinical      | NA        | VppAsia | CG12 | GCA_000491955.1 | GeneBank |
| S012         | 1990 | Thailand         | Clinical      | NA        | VppAsia | CG12 | GCA_000491935.1 | GeneBank |
| S013         | 1996 | China: Taiwan    | Clinical      | NA        | VppAsia | CG12 | GCA_000491915.1 | GeneBank |
| S014         | 1992 | China: Taiwan    | Clinical      | NA        | VppAsia |      | GCA_000491895.1 | GeneBank |
| S015         | 1992 | China: Taiwan    | Clinical      | NA        | VppAsia |      | GCA_000491875.1 | GeneBank |
| S016         | 1992 | China: Taiwan    | Clinical      | NA        | VppAsia | CG4  | GCA_000491855.1 | GeneBank |
| S017         | 1992 | China: Taiwan    | Clinical      | NA        | VppAsia |      | GCA_000491835.1 | GeneBank |
| S018         | 1993 | China: Taiwan    | Clinical      | NA        | VppAsia | CG4  | GCA_000491815.1 | GeneBank |
| S019         | 1998 | USA              | Clinical      | NA        | Hybrid  |      | GCA_000491795.1 | GeneBank |
| S020         | 1994 | China: Taiwan    | Clinical      | NA        | VppAsia |      | GCA_000491775.1 | GeneBank |
| S021         | 1999 | India            | Clinical      | NA        | VppAsia |      | GCA_000491755.1 | GeneBank |
| S022         | 1984 | Japan            | Clinical      | NA        | VppAsia | CG13 | GCA_000491735.1 | GeneBank |
| S023         | 1994 | China: Taiwan    | Clinical      | NA        | VppAsia |      | GCA_000491715.1 | GeneBank |
| S024         | 1998 | China: Taiwan    | Clinical      | NA        | VppAsia |      | GCA_000491695.1 | GeneBank |
| S025         | 1992 | China: Taiwan    | Clinical      | NA        | VppAsia |      | GCA_000491675.1 | GeneBank |
| S026         | NA   | Thailand         | Clinical      | NA        | VppAsia |      | GCA_000491655.1 | GeneBank |
| S027         | NA   | USA              | Clinical      | NA        | VppAsia |      | GCA_000491635.1 | GeneBank |
| S028         | NA   | Thailand         | Clinical      | NA        | VppAsia |      | GCA_000491615.1 | GeneBank |

|      |      |               |               |    |         |      |                          |
|------|------|---------------|---------------|----|---------|------|--------------------------|
| S029 | 1981 | Spain         | Environmental | NA | VppAsia |      | GCA_000491595.1 GeneBank |
| S030 | 1999 | India         | Clinical      | NA | VppAsia | CG3  | GCA_000491575.1 GeneBank |
| S031 | 1984 | Japan         | Clinical      | NA | VppAsia | CG3  | GCA_000491555.1 GeneBank |
| S032 | 1998 | Phillipine    | Clinical      | NA | VppAsia | CG13 | GCA_000491535.1 GeneBank |
| S033 | 1994 | China: Taiwan | Clinical      | NA | VppAsia | CG13 | GCA_000491515.1 GeneBank |
| S034 | 1999 | India         | Clinical      | NA | VppAsia | CG13 | GCA_000491495.1 GeneBank |
| S035 | 1984 | Japan         | Clinical      | NA | VppAsia | CG13 | GCA_000491475.1 GeneBank |
| S036 | NA   | Thailand      | Clinical      | NA | VppAsia | CG13 | GCA_000491455.1 GeneBank |
| S037 | 1994 | USA           | Clinical      | NA | VppX    | CG2  | GCA_000491435.1 GeneBank |
| S038 | 1982 | USA           | Environmental | NA | VppX    | CG2  | GCA_000491415.1 GeneBank |
| S039 | NA   | China: Taiwan | Clinical      | NA | VppAsia |      | GCA_000491395.1 GeneBank |
| S040 | 1990 | Thailand      | Clinical      | NA | VppAsia |      | GCA_000491375.1 GeneBank |
| S041 | 1993 | China: Taiwan | Clinical      | NA | VppAsia |      | GCA_000491355.1 GeneBank |
| S042 | 1984 | Japan         | Clinical      | NA | VppAsia |      | GCA_000491335.1 GeneBank |
| S043 | NA   | Thailand      | Clinical      | NA | VppAsia |      | GCA_000491315.1 GeneBank |
| S044 | 1990 | Thailand      | Clinical      | NA | VppAsia |      | GCA_000491295.1 GeneBank |
| S045 | 1990 | Thailand      | Clinical      | NA | VppAsia |      | GCA_000491275.1 GeneBank |
| S046 | 1982 | Spain         | Environmental | NA | VppX    |      | GCA_000491255.1 GeneBank |
| S047 | 1981 | Spain         | Environmental | NA | VppAsia |      | GCA_000491235.1 GeneBank |
| S048 | 1997 | USA           | Environmental | NA | VppX    |      | GCA_000491215.1 GeneBank |
| S049 | 1984 | Japan         | Clinical      | NA | VppAsia | CG13 | GCA_000491195.1 GeneBank |
| S052 | 1975 | Spain         | Environmental | NA | VppUS1  |      | GCA_000491175.1 GeneBank |
| S053 | 1990 | Thailand      | Clinical      | NA | VppAsia |      | GCA_000491155.1 GeneBank |
| S054 | NA   | Thailand      | Clinical      | NA | VppAsia |      | GCA_000491135.1 GeneBank |
| S055 | 1994 | China: Taiwan | Clinical      | NA | VppAsia |      | GCA_000491115.1 GeneBank |
| S056 | 1994 | China: Taiwan | Clinical      | NA | VppAsia |      | GCA_000491095.1 GeneBank |
| S057 | 1994 | China: Taiwan | Clinical      | NA | VppAsia |      | GCA_000491075.1 GeneBank |
| S058 | 1970 | Japan         | Clinical      | NA | VppAsia |      | GCA_000491055.1 GeneBank |
| S060 | 1992 | China: Taiwan | Clinical      | NA | VppAsia |      | GCA_000491035.1 GeneBank |
| S062 | 1998 | Singapore     | Clinical      | NA | VppAsia | CG1  | GCA_000491015.1 GeneBank |
| S063 | 1998 | China: Taiwan | Clinical      | NA | VppAsia | CG1  | GCA_000490995.1 GeneBank |
| S064 | 1998 | China: Taiwan | Clinical      | NA | VppAsia | CG1  | GCA_000490975.1 GeneBank |
| S065 | 1998 | China: Taiwan | Clinical      | NA | VppAsia | CG1  | GCA_000490955.1 GeneBank |
| S066 | 1997 | China: Taiwan | Clinical      | NA | VppAsia | CG1  | GCA_000490935.1 GeneBank |

|      |      |               |               |    |         |      |                          |
|------|------|---------------|---------------|----|---------|------|--------------------------|
| S067 | 1997 | China: Taiwan | Clinical      | NA | VppAsia | CG1  | GCA_000490915.1 GeneBank |
| S068 | 1997 | China: Taiwan | Clinical      | NA | VppAsia | CG1  | GCA_000490895.1 GeneBank |
| S069 | NA   | Thailand      | Clinical      | NA | VppAsia | CG1  | GCA_000490875.1 GeneBank |
| S070 | NA   | Thailand      | Clinical      | NA | VppAsia | CG1  | GCA_000490855.1 GeneBank |
| S071 | 1998 | Bangladesh    | Clinical      | NA | VppAsia | CG1  | GCA_000490835.1 GeneBank |
| S072 | 1998 | Bangladesh    | Clinical      | NA | VppAsia | CG1  | GCA_000490815.1 GeneBank |
| S073 | 1997 | Thailand      | Clinical      | NA | VppAsia |      | GCA_000490795.1 GeneBank |
| S074 | 1997 | China: Taiwan | Clinical      | NA | VppAsia | CG1  | GCA_000490775.1 GeneBank |
| S075 | 1999 | China: Taiwan | Clinical      | NA | VppAsia | CG1  | GCA_000490755.1 GeneBank |
| S076 | 1999 | China: Taiwan | Clinical      | NA | VppAsia | CG1  | GCA_000490735.1 GeneBank |
| S077 | 1999 | China: Taiwan | Clinical      | NA | VppAsia | CG1  | GCA_000490715.1 GeneBank |
| S078 | 1999 | China: Taiwan | Clinical      | NA | VppAsia | CG1  | GCA_000490695.1 GeneBank |
| S079 | NA   | Indonesia     | Clinical      | NA | VppAsia | CG1  | GCA_000490675.1 GeneBank |
| S081 | NA   | Korea         | Clinical      | NA | VppAsia | CG1  | GCA_000490655.1 GeneBank |
| S082 | NA   | Thailand      | Clinical      | NA | VppAsia | CG1  | GCA_000490635.1 GeneBank |
| S083 | 1998 | Japan         | Clinical      | NA | VppAsia | CG1  | GCA_000490615.1 GeneBank |
| S086 | 1999 | Thailand      | Clinical      | NA | VppAsia | CG1  | GCA_000490595.1 GeneBank |
| S087 | 1998 | Singapore     | Clinical      | NA | VppAsia | CG1  | GCA_000490575.1 GeneBank |
| S088 | 1998 | Singapore     | Clinical      | NA | VppAsia | CG1  | GCA_000490555.1 GeneBank |
| S090 | 1999 | China: Taiwan | Clinical      | NA | VppAsia | CG1  | GCA_000490535.1 GeneBank |
| S091 | 1999 | India         | Clinical      | NA | VppAsia | CG1  | GCA_000490515.1 GeneBank |
| S092 | 1996 | China: Taiwan | Clinical      | NA | VppAsia | CG1  | GCA_000493715.1 GeneBank |
| S093 | 1998 | Japan         | Clinical      | NA | VppAsia |      | GCA_000490485.1 GeneBank |
| S094 | 1996 | Thailand      | Clinical      | NA | VppAsia | CG1  | GCA_000490465.1 GeneBank |
| S095 | 1996 | China: Taiwan | Clinical      | NA | VppAsia | CG12 | GCA_000490445.1 GeneBank |
| S096 | 1999 | Korea         | Clinical      | NA | VppAsia |      | GCA_000493225.1 GeneBank |
| S097 | 1992 | China: Taiwan | Clinical      | NA | VppX    |      | GCA_000490415.1 GeneBank |
| S098 | 1997 | USA           | Environmental | NA | Hybrid  |      | GCA_000490395.1 GeneBank |
| S100 | 1990 | USA           | Environmental | NA | VppUS1  |      | GCA_000490375.1 GeneBank |
| S101 | 1990 | USA           | Environmental | NA | VppUS2  | CG5  | GCA_000490355.1 GeneBank |
| S104 | 1997 | USA           | Clinical      | NA | VppX    | CG8  | GCA_000490335.1 GeneBank |
| S105 | 1984 | Japan         | Clinical      | NA | VppAsia |      | GCA_000490315.1 GeneBank |
| S106 | 1990 | Thailand      | Clinical      | NA | VppAsia |      | GCA_000490295.1 GeneBank |
| S108 | 1990 | Thailand      | Clinical      | NA | VppAsia |      | GCA_000490275.1 GeneBank |

|      |      |                       |               |    |         |      |                          |
|------|------|-----------------------|---------------|----|---------|------|--------------------------|
| S109 | 1993 | China: Taiwan         | Clinical      | NA | VppAsia |      | GCA_000490255.1 GeneBank |
| S110 | 1999 | India                 | Clinical      | NA | VppAsia |      | GCA_000490235.1 GeneBank |
| S111 | 1990 | Thailand              | Clinical      | NA | VppAsia |      | GCA_000490215.1 GeneBank |
| S112 | 1951 | Japan                 | Clinical      | NA | VppAsia |      | GCA_000490195.1 GeneBank |
| S113 | 1990 | India                 | Clinical      | NA | VppAsia |      | GCA_000490175.1 GeneBank |
| S114 | 1998 | India                 | Clinical      | NA | VppAsia |      | GCA_000490155.1 GeneBank |
| S115 | 1991 | Thailand              | Clinical      | NA | VppAsia |      | GCA_000490135.1 GeneBank |
| S116 | NA   | Thailand              | Clinical      | NA | VppAsia |      | GCA_000490115.1 GeneBank |
| S117 | 1984 | Japan                 | Clinical      | NA | VppAsia |      | GCA_000490095.1 GeneBank |
| S118 | 1984 | Japan                 | Clinical      | NA | VppAsia |      | GCA_000490075.1 GeneBank |
| S119 | 1999 | China: Taiwan         | Clinical      | NA | VppAsia |      | GCA_000490055.1 GeneBank |
| S120 | 1990 | Thailand              | Clinical      | NA | VppAsia |      | GCA_000490035.1 GeneBank |
| S121 | NA   | Thailand              | Clinical      | NA | VppAsia |      | GCA_000490015.1 GeneBank |
| S122 | 1999 | India                 | Clinical      | NA | VppAsia |      | GCA_000489995.1 GeneBank |
| S123 | 1984 | Japan                 | Clinical      | NA | VppAsia |      | GCA_000489975.1 GeneBank |
| S124 | 1992 | China: Taiwan         | Clinical      | NA | VppAsia |      | GCA_000489955.1 GeneBank |
| S125 | 1997 | USA                   | Environmental | NA | VppAsia |      | GCA_000489935.1 GeneBank |
| S126 | NA   | China: Taiwan         | Clinical      | NA | VppAsia | CG1  | GCA_000489915.1 GeneBank |
| S128 | 1999 | India                 | Clinical      | NA | VppAsia |      | GCA_000489895.1 GeneBank |
| S129 | 1984 | Japan                 | Clinical      | NA | VppX    | CG8  | GCA_000489875.1 GeneBank |
| S130 | 2003 | NA                    | Clinical      | NA | VppAsia |      | GCA_000489855.1 GeneBank |
| S131 | 2003 | NA                    | Clinical      | NA | VppAsia | CG1  | GCA_000489835.1 GeneBank |
| S132 | 2005 | China: Liaoning       | Clinical      | NA | VppAsia |      | GCA_000489815.1 GeneBank |
| S133 | 2005 | China: Liaoning       | Clinical      | NA | VppAsia | CG1  | GCA_000489795.1 GeneBank |
| S134 | 2005 | China: Liaoning       | Clinical      | NA | VppAsia |      | GCA_000489775.1 GeneBank |
| S135 | 2003 | China: Guangxi        | Clinical      | NA | VppAsia | CG1  | GCA_000489755.1 GeneBank |
| S136 | 2004 | China: Guangxi        | Clinical      | NA | VppAsia | CG1  | GCA_000489735.1 GeneBank |
| S137 | 2005 | China: Guangxi        | Clinical      | NA | VppAsia | CG1  | GCA_000489715.1 GeneBank |
| S138 | 2007 | China: Hubei          | Clinical      | NA | VppAsia | CG1  | GCA_000489695.1 GeneBank |
| S139 | 2006 | China: inter Mongolia | Environmental | NA | VppAsia |      | GCA_000489675.1 GeneBank |
| S140 | 2006 | China: Shandong       | Environmental | NA | VppAsia |      | GCA_000489655.1 GeneBank |
| S141 | 2006 | China: Shandong       | Environmental | NA | VppAsia |      | GCA_000489635.1 GeneBank |
| S142 | 2006 | China: Shandong       | Environmental | NA | VppAsia |      | GCA_000489615.1 GeneBank |
| S143 | 2006 | China: Shandong       | Environmental | NA | VppAsia | CG11 | GCA_000489595.1 GeneBank |

|         |      |                       |               |           |         |      |                          |
|---------|------|-----------------------|---------------|-----------|---------|------|--------------------------|
| S144    | 2006 | China: Shandong       | Environmental | NA        | VppAsia | CG11 | GCA_000489575.1 GeneBank |
| S145    | 2006 | China: inter Mongolia | Environmental | NA        | VppAsia |      | GCA_000489555.1 GeneBank |
| S146    | 2006 | China: inter Mongolia | Environmental | NA        | VppAsia |      | GCA_000489535.1 GeneBank |
| S147    | 2006 | China: inter Mongolia | Environmental | NA        | VppAsia |      | GCA_000489515.1 GeneBank |
| S148    | 2006 | China: inter Mongolia | Environmental | NA        | VppAsia |      | GCA_000489495.1 GeneBank |
| S150    | 2006 | China: Shandong       | Environmental | NA        | VppAsia | CG11 | GCA_000489475.1 GeneBank |
| S151    | 2006 | China: Shandong       | Environmental | NA        | VppAsia | CG11 | GCA_000489455.1 GeneBank |
| S152    | 2006 | China: Shandong       | Environmental | NA        | VppAsia |      | GCA_000489435.1 GeneBank |
| S153    | 2006 | China: Shandong       | Environmental | NA        | VppAsia | CG11 | GCA_000489415.1 GeneBank |
| S154    | 2006 | China: Shandong       | Environmental | NA        | VppAsia | CG11 | GCA_000489395.1 GeneBank |
| S155    | 2006 | China: Shandong       | Environmental | NA        | VppAsia | CG11 | GCA_000489375.1 GeneBank |
| S156    | 2006 | China: Shandong       | Environmental | NA        | VppAsia | CG11 | GCA_000489355.1 GeneBank |
| S157    | 2006 | China: Shandong       | Environmental | NA        | VppAsia |      | GCA_000489335.1 GeneBank |
| S158    | 2006 | China: Shandong       | Environmental | NA        | VppAsia | CG11 | GCA_000489315.1 GeneBank |
| S159    | 2006 | China: Shandong       | Environmental | NA        | VppAsia |      | GCA_000489295.1 GeneBank |
| S161    | 2006 | China: Shandong       | Environmental | NA        | VppAsia | CG11 | GCA_000489255.1 GeneBank |
| S162    | 2007 | Thailand              | Environmental | NA        | VppAsia |      | GCA_000489235.1 GeneBank |
| S163    | 2007 | Malaysia              | Environmental | NA        | VppAsia |      | GCA_000489215.1 GeneBank |
| S164    | 2007 | USA                   | Environmental | NA        | VppAsia |      | GCA_000489195.1 GeneBank |
| S165    | 2007 | China: Shandong       | Environmental | NA        | VppAsia |      | GCA_000489175.1 GeneBank |
| S166    | 2007 | China: Shandong       | Environmental | NA        | VppAsia |      | GCA_000489155.1 GeneBank |
| S167    | 2007 | China: Shandong       | Environmental | NA        | VppAsia |      | GCA_000489135.1 GeneBank |
| S168    | 2007 | China: Shandong       | Environmental | NA        | VppAsia |      | GCA_000489115.1 GeneBank |
| S170    | 2007 | China: Shandong       | Environmental | NA        | VppAsia | CG11 | GCA_000489095.1 GeneBank |
| S171    | 2007 | China: Shandong       | Environmental | NA        | VppAsia |      | GCA_000489075.1 GeneBank |
| S172    | 2007 | China: Shandong       | Environmental | NA        | VppAsia |      | GCA_000489055.1 GeneBank |
| S173    | 2007 | China: Shandong       | Environmental | NA        | VppAsia |      | GCA_000489035.1 GeneBank |
| S174    | 2007 | China: Shandong       | Environmental | NA        | VppAsia |      | GCA_000489015.1 GeneBank |
| S195-7  | 2007 | Canada                | Environmental | Others    | VppX    |      | GCA_001268005.1 GeneBank |
| S349-10 | 2010 | Canada                | Environmental | Others    | VppAsia |      | GCA_001268015.1 GeneBank |
| S357-21 | 2010 | Canada                | Environmental | Shellfish | VppUS2  |      | GCA_001273635.1 GeneBank |
| S372-5  | 2011 | Canada                | Environmental | Shellfish | VppUS1  |      | GCA_001280655.1 GeneBank |
| S383-6  | 2011 | Canada                | Environmental | Others    | VppX    |      | GCA_001267625.1 GeneBank |
| S440-7  | 2012 | Canada                | Environmental | Shellfish | VppUS1  |      | GCA_001270235.1 GeneBank |

|               |      |                          |               |           |         |      |                          |
|---------------|------|--------------------------|---------------|-----------|---------|------|--------------------------|
| S448-16       | 2012 | Canada                   | Environmental | NA        | VppX    |      | GCA_001267635.1 GeneBank |
| S487-4        | 2013 | Canada                   | Environmental | Shellfish | VppAsia | CG10 | GCA_001270215.1 GeneBank |
| S499-7        | 2013 | Canada                   | Environmental | Shellfish | VppX    |      | GCA_001270145.1 GeneBank |
| SBR10290      | 1997 | USA                      | Clinical      | Stool     | VppX    | CG2  | GCA_000522045.2 GeneBank |
| SG176         | 2006 | USA: GA                  | Environmental | NA        | VppAsia |      | GCA_000958565.1 GeneBank |
| SNUVpS-1      | 2009 | SouthKorea               | Environmental | Shellfish | VppAsia |      | GCA_000315135.1 GeneBank |
| T12739        | 2007 | Canada: British Columbia | Clinical      | NA        | VppAsia |      | GCA_000786835.1 GeneBank |
| T8994         | 2006 | Canada: British Columbia | Clinical      | Stool     | VppX    | CG2  | GCA_001608865.1 GeneBank |
| T9109         | 2007 | Canada: British Columbia | Clinical      | NA        | VppAsia |      | GCA_000786845.1 GeneBank |
| TUMSAT_D06_S3 | NA   | Thailand                 | Environmental | Shellfish | VppAsia |      | GCA_000591495.1 GeneBank |
| TUMSAT_DE1_S1 | NA   | Thailand                 | Environmental | Shellfish | VppX    |      | GCA_000591455.1 GeneBank |
| TUMSAT_H01_S4 | NA   | Thailand                 | Environmental | Shellfish | VppUS1  |      | GCA_000591515.1 GeneBank |
| TUMSAT_H10_S6 | NA   | Thailand                 | Environmental | Shellfish | VppAsia |      | GCA_000591555.1 GeneBank |
| TX2103        | 1998 | USA                      | Clinical      | NA        | VppAsia | CG1  | SRR5071094 GeneBank      |
| UCM-V493      | NA   | spain                    | Environmental | NA        | VppAsia |      | GCA_000568495.1 GeneBank |
| V05-002       | 1972 | UK: Norfolk              | Clinical      | NA        | VppAsia |      | SRR5639911 GeneBank      |
| V06-002       | 1980 | UK: Maidstone            | Clinical      | NA        | VppAsia |      | SRR5639918 GeneBank      |
| v110          | 2010 | China: Hong Kong         | Environmental | Shellfish | VppAsia |      | GCA_000388025.1 GeneBank |
| V12-024       | 2014 | UK                       | NA            | NA        | VppAsia | CG1  | SRR5639912 GeneBank      |
| V14/01        | NA   | NA                       | Environmental | NA        | VppAsia | CG1  | GCA_000558885.2 GeneBank |
| VH3           | 2007 | Greece                   | Environmental | Water     | VppAsia |      | GCA_001013435.1 GeneBank |
| VIP4-0219     | 2006 | China: Hong Kong         | Environmental | Fish      | VppAsia |      | GCA_000500525.1 GeneBank |
| VIP4-0395     | 2007 | China: Hong Kong         | Clinical      | Stool     | VppAsia | CG1  | GCA_000500505.1 GeneBank |
| VIP4-0407     | 2008 | China: Hong Kong         | Clinical      | Stool     | VppAsia | CG1  | GCA_000500405.1 GeneBank |
| VIP4-0430     | 2008 | China: Hong Kong         | Environmental | Shellfish | VppAsia |      | GCA_000500445.1 GeneBank |
| VIP4-0434     | 2008 | China: Hong Kong         | Clinical      | Stool     | VppAsia |      | GCA_000500425.1 GeneBank |
| VIP4-0439     | 2008 | China: Hong Kong         | Clinical      | Stool     | VppAsia | CG1  | GCA_000500365.1 GeneBank |
| VIP4-0444     | 2008 | China: Hong Kong         | Environmental | Fish      | VppAsia |      | GCA_000500485.1 GeneBank |
| VIP4-0447     | 2008 | China: Hong Kong         | Environmental | Shellfish | VppAsia |      | GCA_000500545.1 GeneBank |
| Vp155         | 1996 | India                    | Clinical      | NA        | VppAsia | CG1  | SRR5071101 GeneBank      |
| VP16          | 2012 | USA: MD                  | Clinical      | Stool     | VppAsia | CG1  | SRR1422924 GeneBank      |
| VP17          | 2012 | USA: MD                  | Clinical      | Stool     | VppAsia | CG1  | SRR1422877 GeneBank      |
| VP18          | 2012 | USA: MD                  | Clinical      | Stool     | VppAsia | CG1  | SRR1422883 GeneBank      |
| Vp2           | NA   | NA                       | NA            | NA        | VppAsia | CG1  | SRR5071100 GeneBank      |



|             |      |                          |               |        |         |      |                          |
|-------------|------|--------------------------|---------------|--------|---------|------|--------------------------|
| VP2007-007  | NA   | NA                       | Environmental | NA     | VppUS1  |      | GCA_000558925.2 GeneBank |
| VP2007-095  | NA   | NA                       | Environmental | NA     | VppAsia | CG10 | GCA_000454165.1 GeneBank |
| Vp208       | 1997 | India                    | Clinical      | NA     | VppAsia | CG1  | SRR5071099 GeneBank      |
| VP250       | NA   | NA                       | Environmental | NA     | VppAsia | CG1  | GCA_000454225.1 GeneBank |
| VP-48       | NA   | NA                       | Environmental | NA     | VppAsia | CG1  | GCA_000593285.2 GeneBank |
| VP49        | 2008 | India: Mangalore         | Environmental | Others | VppAsia |      | GCA_000662375.1 GeneBank |
| VP53        | 2005 | China                    | Clinical      | NA     | VppAsia | CG1  | SRR6476834 GeneBank      |
| VP551       | 2007 | USA: WA                  | Environmental | Water  | VppAsia | CG1  | GCA_000877415.1 GeneBank |
| VP766       | 2007 | USA: WA                  | Environmental | Others | VppX    |      | GCA_000877605.1 GeneBank |
| Vp81        | 1996 | India                    | Clinical      | NA     | VppAsia | CG1  | SRR5070652 GeneBank      |
| Vp96        | 1996 | India                    | Clinical      | NA     | VppAsia | CG1  | SRR5071097 GeneBank      |
| VPCR-2009   | NA   | NA                       | Environmental | NA     | VppAsia |      | GCA_000593305.2 GeneBank |
| VpHY145     | 1999 | Thailand                 | Clinical      | NA     | VppAsia | CG1  | SRR5071143 GeneBank      |
| VpHY191     | 1999 | Thailand                 | Clinical      | NA     | VppAsia | CG1  | SRR5071105 GeneBank      |
| VP-NY4      | NA   | NA                       | Environmental | NA     | VppAsia | CG1  | GCA_000454145.1 GeneBank |
| VPTS-2009   | NA   | NA                       | Environmental | NA     | VppAsia |      | GCA_000593325.2 GeneBank |
| VPTS-2010   | NA   | NA                       | Environmental | NA     | VppAsia |      | GCA_000593345.2 GeneBank |
| VPTS-2010_2 | NA   | NA                       | Environmental | NA     | VppUS2  |      | GCA_000593365.2 GeneBank |
| W501        | 2006 | Canada: British Columbia | Clinical      | Stool  | VppAsia |      | GCA_001608855.1 GeneBank |
