# Supplementary material
Source: PubMed Central journal article supplement (PMC6775990)
Supplement: 41396_2019_461_MOESM3_ESM.pdf [file 41396_2019_461_MOESM3_ESM.pdf]

**Supplementary Table 2. The nucleotide differences and  $F_{st}$  among *V. parahaemolyticus* populations.**

|                | <b>VppAsia</b> | <b>VppX</b> | <b>VppUS1</b> | <b>VppUS2</b> |
|----------------|----------------|-------------|---------------|---------------|
| <b>VppAsia</b> | 30227          | 31168       | 33325         | 34357         |
| <b>VppX</b>    | 0.039          | 29729       | 33515         | 34587         |
| <b>VppUS1</b>  | 0.073          | 0.085       | 31637         | 33004         |
| <b>VppUS2</b>  | 0.138          | 0.151       | 0.082         | 28964         |

The nucleotide differences and  $F_{st}$  were marked in green and yellow, respectively.
