# Supplementary material
Source: PubMed Central journal article supplement (PMC6775990)
Supplement: 41396_2019_461_MOESM4_ESM.pdf [file 41396_2019_461_MOESM4_ESM.pdf]

|             |                 |                                                           |   |         |      |      |      |      |      |      |
|-------------|-----------------|-----------------------------------------------------------|---|---------|------|------|------|------|------|------|
| group_3435  | Accessory genes | 3-oxoacyl-(acyl carrier protein) synthase                 |   | VP1399  | 0.00 | 0.00 | 0.00 | 0.00 | 0.00 | 0.86 |
| pknK        | Accessory genes | Serine/threonine-protein kinase PknK                      | T | VP1400  | 0.00 | 0.00 | 0.00 | 0.00 | 0.00 | 0.86 |
| group_2642  | Accessory genes | hypothetical protein                                      | S | VP1401  | 0.00 | 0.00 | 0.00 | 0.00 | 0.00 | 0.86 |
| group_3958  | Accessory genes | hypothetical protein                                      | S | VP1402  | 0.00 | 0.00 | 0.00 | 0.00 | 0.00 | 0.86 |
| group_2479  | Accessory genes | hypothetical protein                                      | S | VP1403  | 0.00 | 0.00 | 0.00 | 0.00 | 0.00 | 0.86 |
| group_2643  | Accessory genes | Gene 25-like lysozyme                                     | S | VP1404  | 0.00 | 0.00 | 0.00 | 0.00 | 0.00 | 0.86 |
| group_3185  | Accessory genes | hypothetical protein                                      | S | VP1406  | 0.00 | 0.00 | 0.00 | 0.00 | 0.00 | 0.86 |
| lrp_7       | Accessory genes | Leucine-responsive regulatory protein                     | K | VP1407  | 0.00 | 0.00 | 0.00 | 0.00 | 0.00 | 0.86 |
| group_456   | Accessory genes | Intracellular multiplication and human macrophage-killing | S | VP1408  | 0.00 | 0.00 | 0.00 | 0.00 | 0.00 | 0.86 |
| group_2100  | Accessory genes | hypothetical protein                                      | S | VP1409  | 0.00 | 0.00 | 0.00 | 0.00 | 0.00 | 0.86 |
| group_3641  | Accessory genes | hypothetical protein                                      |   | VP1410  | 0.00 | 0.00 | 0.00 | 0.00 | 0.00 | 0.86 |
| group_4175  | Accessory genes | FHA domain protein                                        | T | VP1411  | 0.00 | 0.00 | 0.00 | 0.00 | 0.00 | 0.86 |
| group_15999 | Accessory genes | Type VI secretion lipoprotein                             | S | VP1412  | 0.00 | 0.00 | 0.00 | 0.00 | 0.00 | 0.86 |
| group_5499  | Accessory genes | hypothetical protein                                      | S | VP1413  | 0.00 | 0.00 | 0.00 | 0.00 | 0.00 | 0.86 |
| group_3416  | Accessory genes | hypothetical protein                                      | S | VP1414  | 0.00 | 0.00 | 0.00 | 0.00 | 0.00 | 0.86 |
| group_5473  | Accessory genes | HTH-type transcriptional regulator DmlR                   | K | VP1676  | 0.93 | 0.99 | 0.99 | 0.00 | 0.00 | 0.00 |
| group_1578  | Accessory genes | Alpha/beta hydrolase family protein                       | S | VP1677  | 0.93 | 0.99 | 0.99 | 0.00 | 0.00 | 0.00 |
| group_2897  | Accessory genes | Alpha/beta hydrolase family protein                       | S | VP1678  | 0.93 | 0.99 | 0.99 | 0.00 | 0.00 | 0.00 |
| group_161   | Accessory genes | flavodoxin                                                | C | VP1679  | 0.93 | 0.99 | 0.99 | 0.00 | 0.00 | 0.00 |
| appY_3      | Accessory genes | HTH-type transcriptional regulator AppY                   | K | VP1765  | 0.00 | 0.00 | 0.82 | 0.00 | 0.00 | 0.83 |
| group_674   | Accessory genes | Alanine--tRNA ligase                                      | S | VP1766  | 0.00 | 0.00 | 0.82 | 0.00 | 0.00 | 0.83 |
| group_807   | Accessory genes | hypothetical protein                                      | S | VP1784  | 0.00 | 0.00 | 0.00 | 0.85 | 0.00 | 0.82 |
| ydaF_4      | Accessory genes | Glyoxalase-like domain protein                            |   | VP1786  | 0.00 | 0.00 | 0.00 | 0.85 | 0.00 | 0.00 |
| polC_1      | Accessory genes | DNA polymerase III PolC-type                              | L | VPA0074 | 0.93 | 0.99 | 0.00 | 0.00 | 0.94 | 0.00 |
| kdsD_3      | Accessory genes | inosine 5'-monophosphate dehydrogenase                    | T | VPA0075 | 0.94 | 0.99 | 0.00 | 0.00 | 0.94 | 0.00 |
| kdgR        | Accessory genes | Transcriptional regulator KdgR                            | K | VPA0076 | 0.94 | 0.99 | 0.00 | 0.00 | 0.94 | 0.00 |
| kduD        | Accessory genes | 2-dehydro-3-deoxy-D-gluconate 5-dehydrogenase             | S | VPA0077 | 0.94 | 0.99 | 0.00 | 0.00 | 0.94 | 0.00 |

|            |                 |                                                  |   |         |      |      |      |      |      |      |
|------------|-----------------|--------------------------------------------------|---|---------|------|------|------|------|------|------|
| ygjV       | Accessory genes | Inner membrane protein YgjV                      | S | VPA0078 | 0.93 | 0.99 | 0.00 | 0.00 | 0.91 | 0.98 |
| group_7024 | Accessory genes | Cupin domain protein                             | S | VPA0079 | 0.94 | 0.99 | 0.00 | 0.00 | 0.94 | 0.00 |
| group_7025 | Accessory genes | hypothetical protein                             | G | VPA0080 | 0.94 | 0.99 | 0.00 | 0.00 | 0.94 | 0.00 |
| axeA1      | Accessory genes | Acetylxylan esterase precursor                   | I | VPA0081 | 0.94 | 0.99 | 0.00 | 0.00 | 0.94 | 0.00 |
| eda_2      | Accessory genes | Putative KHG/KDPG aldolase                       | G | VPA0082 | 0.94 | 0.99 | 0.00 | 0.00 | 0.94 | 0.00 |
| sglT_2     | Accessory genes | Sodium/glucose cotransporter                     | E | VPA0084 | 0.94 | 0.99 | 0.00 | 0.00 | 0.94 | 0.00 |
| kdgM       | Accessory genes | Oligogalacturonate-specific porin KdgM precursor | M | VPA0085 | 0.93 | 0.99 | 0.00 | 0.00 | 0.94 | 0.00 |
| pelX       | Accessory genes | Pectate disaccharide-lyase precursor             | S | VPA0086 | 0.93 | 0.99 | 0.00 | 0.00 | 0.94 | 0.00 |
| group_1876 | Accessory genes | Sodium/glucose cotransporter                     | E | VPA0087 | 0.92 | 0.98 | 0.00 | 0.00 | 0.94 | 0.00 |
| ogl        | Accessory genes | Oligogalacturonate lyase                         | U | VPA0088 | 0.94 | 0.99 | 0.00 | 0.00 | 0.94 | 0.00 |
| group_1383 | Accessory genes | HTH-type transcriptional regulator LeuO          | K | VPA0105 | 0.00 | 0.95 | 0.00 | 0.00 | 0.00 | 0.92 |
| group_1171 | Accessory genes | hypothetical protein                             | S | VPA0106 | 0.00 | 0.95 | 0.00 | 0.00 | 0.00 | 0.92 |
| syrM1      | Accessory genes | HTH-type transcriptional regulator SyrM 1        | K | VPA0107 | 0.00 | 0.95 | 0.00 | 0.00 | 0.00 | 0.92 |
| group_1013 | Accessory genes | Phosphoglycolate phosphatase                     | S | VPA0110 | 0.94 | 0.99 | 0.00 | 0.00 | 0.00 | 0.00 |
| group_377  | Accessory genes | hypothetical protein                             |   | VPA0282 | 0.81 | 0.88 | 0.00 | 0.00 | 0.91 | 0.98 |
| ybdO       | Accessory genes | putative HTH-type transcriptional regulator YbdO | K | VPA0599 | 0.81 | 0.00 | 0.81 | 0.88 | 0.00 | 0.88 |
| group_1094 | Accessory genes | Arylsulfatase                                    | P | VPA0600 | 0.81 | 0.00 | 0.00 | 0.82 | 0.00 | 0.81 |
| chuR_1     | Accessory genes | Anaerobic sulfatase-maturing enzyme              | S | VPA0601 | 0.85 | 0.00 | 0.85 | 0.88 | 0.00 | 0.88 |
| group_439  | Accessory genes | HTH-type transcriptional regulator YidZ          | K | VPA0602 | 0.00 | 0.00 | 0.00 | 0.88 | 0.00 | 0.88 |
| atsA_1     | Accessory genes | Arylsulfatase precursor                          | P | VPA0683 | 0.00 | 0.85 | 0.00 | 0.00 | 0.00 | 0.85 |
| group_1858 | Accessory genes | hypothetical protein                             |   | VPA0992 | 0.00 | 0.00 | 0.00 | 0.00 | 0.91 | 0.98 |
| group_2143 | Accessory genes | NPCBM-associated                                 | S | VPA0993 | 0.00 | 0.00 | 0.00 | 0.00 | 0.91 | 0.98 |
| group_86   | Accessory genes | hypothetical protein                             | S | VPA1608 | 0.00 | 0.85 | 0.00 | 0.00 | 0.00 | 0.00 |
| adiA_1     | Accessory genes | Biodegradative arginine decarboxylase            | E |         | 0.00 | 0.00 | 0.88 | 0.00 | 0.88 | 0.88 |
| adiA_2     | Accessory genes | Biodegradative arginine decarboxylase            | E |         | 0.00 | 0.00 | 0.88 | 0.00 | 0.88 | 0.88 |
| adiC       | Accessory genes | Arginine/agmatine antiporter                     | P |         | 0.00 | 0.00 | 0.90 | 0.00 | 0.90 | 0.90 |

|             |                 |                                                                            |   |      |      |      |      |      |      |
|-------------|-----------------|----------------------------------------------------------------------------|---|------|------|------|------|------|------|
| asD         | Accessory genes | Bifunctional aspartate aminotransferase and L-aspartate beta-decarboxylase | E | 0.00 | 0.95 | 0.00 | 0.00 | 0.00 | 0.95 |
| aspT_1      | Accessory genes | Aspartate/alanine antiporter                                               | P | 0.00 | 0.95 | 0.00 | 0.00 | 0.00 | 0.95 |
| atsA_4      | Accessory genes | Arylsulfatase                                                              | P | 0.00 | 0.85 | 0.00 | 0.00 | 0.00 | 0.85 |
| cls_1       | Accessory genes | Cardiolipin synthase                                                       | I | 0.00 | 0.95 | 0.00 | 0.00 | 0.00 | 0.95 |
| dmlR_11     | Accessory genes | HTH-type transcriptional regulator DmlR                                    | K | 0.00 | 0.00 | 0.88 | 0.00 | 0.81 | 0.88 |
| dmlR_17     | Accessory genes | HTH-type transcriptional regulator DmlR                                    | K | 0.99 | 0.99 | 0.00 | 0.00 | 0.95 | 0.95 |
| dthadh      | Accessory genes | D-threo-3-hydroxyaspartate dehydratase                                     | E | 0.99 | 0.99 | 0.00 | 0.00 | 0.95 | 0.95 |
| emrK_2      | Accessory genes | putative multidrug resistance protein EmrK                                 | V | 0.00 | 0.00 | 0.88 | 0.00 | 0.88 | 0.00 |
| fac-dex     | Accessory genes | Fluoroacetate dehalogenase                                                 | S | 0.99 | 0.99 | 0.00 | 0.00 | 0.95 | 0.95 |
| gbpR        | Accessory genes | HTH-type transcriptional regulator GbpR                                    | K | 0.00 | 0.00 | 0.90 | 0.00 | 0.90 | 0.90 |
| glnH_2      | Accessory genes | ABC transporter glutamine-binding protein GlnH precursor                   | E | 0.00 | 0.00 | 0.90 | 0.00 | 0.90 | 0.90 |
| group_10915 | Accessory genes | hypothetical protein                                                       |   | 0.00 | 0.00 | 0.85 | 0.00 | 0.86 | 0.86 |
| group_1125  | Accessory genes | hypothetical protein                                                       |   | 0.00 | 0.00 | 0.00 | 0.00 | 0.00 | 0.86 |
| group_1163  | Accessory genes | NPCBM-associated                                                           | S | 0.00 | 0.00 | 0.00 | 0.00 | 0.91 | 0.98 |
| group_1406  | Accessory genes | hypothetical protein                                                       |   | 0.00 | 0.00 | 0.00 | 0.00 | 0.91 | 0.98 |
| group_16220 | Accessory genes | L-lysine cyclodeaminase                                                    | E | 0.99 | 0.99 | 0.00 | 0.00 | 0.95 | 0.95 |
| group_16624 | Accessory genes | Surface antigen                                                            | S | 0.00 | 0.95 | 0.00 | 0.00 | 0.00 | 0.95 |
| group_1818  | Accessory genes | Major Facilitator Superfamily protein                                      | P | 0.00 | 0.00 | 0.88 | 0.00 | 0.88 | 0.00 |
| group_2253  | Accessory genes | hypothetical protein                                                       |   | 0.00 | 0.93 | 0.00 | 0.00 | 0.00 | 0.00 |
| group_3327  | Accessory genes | HTH-type transcriptional regulator YidZ                                    | K | 0.93 | 0.99 | 0.00 | 0.00 | 0.89 | 0.95 |
| group_3405  | Accessory genes | Metallo-beta-lactamase superfamily protein                                 | Q | 0.93 | 0.00 | 0.00 | 0.94 | 0.91 | 0.00 |
| group_3824  | Accessory genes | Surface antigen                                                            | M | 0.00 | 0.90 | 0.00 | 0.83 | 0.00 | 0.00 |
| group_4234  | Accessory genes | Miniconductance mechanosensitive channel MscM precursor                    | M | 0.00 | 0.00 | 0.83 | 0.00 | 0.83 | 0.83 |
| group_4422  | Accessory genes | hypothetical protein                                                       |   | 0.00 | 0.95 | 0.00 | 0.00 | 0.00 | 0.95 |



|        |                 |                                                                                       |   |        |      |      |      |      |      |      |
|--------|-----------------|---------------------------------------------------------------------------------------|---|--------|------|------|------|------|------|------|
| pepP   | Accessory genes | Xaa-Pro aminopeptidase                                                                | E |        | 0.00 | 0.85 | 0.00 | 0.85 | 0.00 | 0.85 |
| pnbA   | Accessory genes | Para-nitrobenzyl esterase                                                             | I |        | 0.00 | 0.95 | 0.00 | 0.00 | 0.00 | 0.95 |
| potE_2 | Accessory genes | Putrescine-ornithine antiporter                                                       | E |        | 0.00 | 0.00 | 0.90 | 0.00 | 0.90 | 0.90 |
| ptpA   | Accessory genes | Prolyl tripeptidyl peptidase precursor                                                | E |        | 0.00 | 1.00 | 0.00 | 0.00 | 0.00 | 0.00 |
| srpR   | Accessory genes | HTH-type transcriptional regulator SrpR                                               | K |        | 0.00 | 0.90 | 0.00 | 0.83 | 0.00 | 0.00 |
| tamA_2 | Accessory genes | Translocation and assembly module TamA precursor                                      | M |        | 0.00 | 0.95 | 0.00 | 0.00 | 0.00 | 0.95 |
| yxaF   | Accessory genes | putative HTH-type transcriptional regulator YxaF                                      | K |        | 0.00 | 0.00 | 0.88 | 0.00 | 0.88 | 0.00 |
| VP0013 | Core genes      | recombination protein F                                                               |   | VP0013 | 0.00 | 0.83 | 0.00 | 0.00 | 0.00 | 0.00 |
| VP0133 | Core genes      | general secretion pathway protein D                                                   |   | VP0133 | 0.00 | 0.00 | 0.00 | 0.82 | 0.00 | 0.93 |
| VP0307 | Core genes      | hypothetical protein                                                                  |   | VP0307 | 0.00 | 0.92 | 0.00 | 0.00 | 0.00 | 0.95 |
| VP0308 | Core genes      | hypothetical protein                                                                  |   | VP0308 | 0.00 | 0.95 | 0.00 | 0.00 | 0.00 | 0.95 |
| VP0338 | Core genes      | survival protein SurA                                                                 |   | VP0338 | 0.00 | 0.00 | 0.00 | 0.00 | 0.00 | 0.82 |
| VP0456 | Core genes      | UDP-N-acetylmuramoylalanyl-D-glutamyl-2%2C 6-diaminopimelate-D-alanyl-D-alanyl ligase |   | VP0456 | 0.00 | 0.81 | 0.00 | 0.00 | 0.00 | 0.00 |
| VP0508 | Core genes      | flavodoxin FldB                                                                       |   | VP0508 | 0.00 | 0.00 | 0.00 | 0.00 | 0.00 | 0.82 |
| VP0561 | Core genes      | CipB protein                                                                          |   | VP0561 | 0.00 | 0.86 | 0.00 | 0.85 | 0.00 | 0.85 |
| VP0564 | Core genes      | penicillin-insensitive murein endopeptidase                                           |   | VP0564 | 0.00 | 0.85 | 0.00 | 0.00 | 0.00 | 0.84 |
| VP0588 | Core genes      | queuine tRNA-ribosyltransferase                                                       |   | VP0588 | 0.00 | 0.85 | 0.00 | 0.00 | 0.00 | 0.00 |
| VP0627 | Core genes      | hypothetical protein                                                                  |   | VP0627 | 0.00 | 0.82 | 0.00 | 0.00 | 0.00 | 0.85 |
| VP0628 | Core genes      | hypothetical protein                                                                  |   | VP0628 | 0.00 | 0.87 | 0.00 | 0.00 | 0.00 | 0.88 |
| VP0629 | Core genes      | homocysteine synthase                                                                 |   | VP0629 | 0.81 | 0.87 | 0.00 | 0.00 | 0.00 | 0.84 |
| VP0632 | Core genes      | Na <sup>+</sup> /H <sup>+</sup> antiporter                                            |   | VP0632 | 0.00 | 0.88 | 0.00 | 0.00 | 0.00 | 0.86 |
| VP0700 | Core genes      | hypothetical protein                                                                  |   | VP0700 | 0.00 | 0.00 | 0.00 | 0.00 | 0.00 | 0.87 |
| VP0713 | Core genes      | hypothetical protein                                                                  |   | VP0713 | 0.00 | 0.91 | 0.00 | 0.00 | 0.00 | 0.92 |
| VP0714 | Core genes      | hypothetical protein                                                                  |   | VP0714 | 0.00 | 0.83 | 0.00 | 0.00 | 0.00 | 0.00 |
| VP0715 | Core genes      | serine hydroxymethyltransferase                                                       |   | VP0715 | 0.00 | 0.87 | 0.00 | 0.00 | 0.00 | 0.98 |
| VP0732 | Core genes      | PhoH family protein                                                                   |   | VP0732 | 0.00 | 0.88 | 0.00 | 0.00 | 0.00 | 0.90 |

|        |            |                                                                   |        |      |      |      |      |      |      |
|--------|------------|-------------------------------------------------------------------|--------|------|------|------|------|------|------|
| VP0758 | Core genes | cation transporter E1-E2 family ATPase                            | VP0758 | 0.00 | 0.00 | 0.00 | 0.00 | 0.00 | 0.82 |
| VP0791 | Core genes | flagellin                                                         | VP0791 | 0.00 | 0.00 | 0.00 | 0.00 | 0.00 | 0.87 |
| VP0794 | Core genes | phosphoenolpyruvate-protein phosphotransferase                    | VP0794 | 0.00 | 0.89 | 0.00 | 0.00 | 0.00 | 0.90 |
| VP0810 | Core genes | PTS system mannose-specific%2C factor IIC                         | VP0810 | 0.00 | 0.90 | 0.00 | 0.00 | 0.00 | 0.87 |
| VP0812 | Core genes | hypothetical protein                                              | VP0812 | 0.00 | 0.94 | 0.00 | 0.00 | 0.00 | 0.93 |
| VP0814 | Core genes | hypothetical protein                                              | VP0814 | 0.00 | 0.91 | 0.00 | 0.00 | 0.00 | 0.82 |
| VP0831 | Core genes | PTS system N-acetylglucosamine-specific transporter subunit IIABC | VP0831 | 0.00 | 0.00 | 0.00 | 0.00 | 0.00 | 0.82 |
| VP0854 | Core genes | AraC family transcriptional regulator                             | VP0854 | 0.00 | 0.95 | 0.00 | 0.00 | 0.00 | 0.92 |
| VP0900 | Core genes | oxidoreductase                                                    | VP0900 | 0.81 | 0.00 | 0.00 | 0.00 | 0.82 | 0.00 |
| VP1015 | Core genes | hypothetical protein                                              | VP1015 | 0.00 | 0.00 | 0.00 | 0.00 | 0.00 | 0.85 |
| VP1134 | Core genes | hypothetical protein                                              | VP1134 | 0.00 | 0.94 | 0.00 | 0.00 | 0.00 | 0.85 |
| VP1135 | Core genes | hypothetical protein                                              | VP1135 | 0.00 | 0.94 | 0.00 | 0.00 | 0.00 | 0.88 |
| VP1148 | Core genes | UDP-2%2C3-diacetylglucosamine hydrolase                           | VP1148 | 0.00 | 0.81 | 0.00 | 0.00 | 0.00 | 0.95 |
| VP1159 | Core genes | hypothetical protein                                              | VP1159 | 0.00 | 0.87 | 0.00 | 0.00 | 0.00 | 0.88 |
| VP1220 | Core genes | 83 kDa decaheme outer membrane cytochrome c                       | VP1220 | 0.00 | 0.93 | 0.00 | 0.00 | 0.00 | 0.93 |
| VP1221 | Core genes | cytochrome subunit of sulfide dehydrogenase                       | VP1221 | 0.00 | 0.89 | 0.00 | 0.00 | 0.00 | 0.95 |
| VP1222 | Core genes | cytochrome c-type protein                                         | VP1222 | 0.00 | 0.84 | 0.00 | 0.88 | 0.00 | 0.00 |
| VP1223 | Core genes | hypothetical protein                                              | VP1223 | 0.00 | 0.85 | 0.00 | 0.00 | 0.00 | 0.87 |
| VP1224 | Core genes | adhesin                                                           | VP1224 | 0.00 | 0.88 | 0.00 | 0.00 | 0.00 | 0.90 |
| VP1254 | Core genes | hypothetical protein                                              | VP1254 | 0.00 | 0.85 | 0.00 | 0.00 | 0.00 | 0.00 |
| VP1255 | Core genes | GGDEF family protein                                              | VP1255 | 0.00 | 0.00 | 0.00 | 0.00 | 0.00 | 0.85 |
| VP1353 | Core genes | hypothetical protein                                              | VP1353 | 0.00 | 0.00 | 0.00 | 0.00 | 0.00 | 0.82 |
| VP1354 | Core genes | hypothetical protein                                              | VP1354 | 0.00 | 0.84 | 0.00 | 0.00 | 0.00 | 0.85 |
| VP1431 | Core genes | ATP-binding protein of a transport system                         | VP1431 | 0.00 | 0.84 | 0.00 | 0.00 | 0.00 | 0.00 |
| VP1441 | Core genes | GGDEF family protein                                              | VP1441 | 0.81 | 0.89 | 0.00 | 0.00 | 0.00 | 0.82 |
| VP1544 | Core genes | cbb3-type cytochrome c oxidase subunit I                          | VP1544 | 0.00 | 0.85 | 0.00 | 0.00 | 0.00 | 0.85 |

|        |            |                                                         |        |      |      |      |      |      |      |
|--------|------------|---------------------------------------------------------|--------|------|------|------|------|------|------|
| VP1674 | Core genes | translocation protein in type III secretion             | VP1674 | 0.00 | 0.90 | 0.00 | 0.00 | 0.00 | 0.90 |
| VP1675 | Core genes | translocation protein in type III secretion             | VP1675 | 0.00 | 0.00 | 0.97 | 0.00 | 0.00 | 0.87 |
| VP1680 | Core genes | hypothetical protein                                    | VP1680 | 0.00 | 0.84 | 0.81 | 0.00 | 0.00 | 0.00 |
| VP1736 | Core genes | hypothetical protein                                    | VP1736 | 0.00 | 0.00 | 0.00 | 0.00 | 0.00 | 0.94 |
| VP1743 | Core genes | hypothetical protein                                    | VP1743 | 0.00 | 0.00 | 0.00 | 0.00 | 0.86 | 0.00 |
| VP1771 | Core genes | 4-aminobutyrate transaminase                            | VP1771 | 0.82 | 0.89 | 0.00 | 0.00 | 0.00 | 0.83 |
| VP1870 | Core genes | hypothetical protein                                    | VP1870 | 0.00 | 0.00 | 0.00 | 0.00 | 0.00 | 0.84 |
| VP1873 | Core genes | fumarate hydratase%2C class I                           | VP1873 | 0.00 | 0.87 | 0.00 | 0.00 | 0.00 | 0.90 |
| VP1902 | Core genes | hypothetical protein                                    | VP1902 | 0.82 | 0.00 | 0.00 | 0.00 | 0.82 | 0.00 |
| VP1978 | Core genes | hypothetical protein                                    | VP1978 | 0.00 | 0.94 | 0.00 | 0.82 | 0.00 | 0.90 |
| VP1979 | Core genes | hypothetical protein                                    | VP1979 | 0.00 | 0.90 | 0.00 | 0.00 | 0.00 | 0.82 |
| VP2076 | Core genes | GGDEF family protein                                    | VP2076 | 0.00 | 0.00 | 0.00 | 0.00 | 0.00 | 0.81 |
| VP2077 | Core genes | maltodextrin glucosidase                                | VP2077 | 0.00 | 0.85 | 0.00 | 0.00 | 0.00 | 0.00 |
| VP2125 | Core genes | Na <sup>+</sup> /H <sup>+</sup> antiporter              | VP2125 | 0.00 | 0.83 | 0.00 | 0.00 | 0.00 | 0.90 |
| VP2126 | Core genes | hypothetical protein                                    | VP2126 | 0.00 | 0.88 | 0.00 | 0.00 | 0.00 | 0.87 |
| VP2127 | Core genes | hypothetical protein                                    | VP2127 | 0.00 | 0.92 | 0.00 | 0.00 | 0.00 | 0.92 |
| VP2128 | Core genes | nucleoid-associated protein NdpA                        | VP2128 | 0.00 | 0.85 | 0.00 | 0.00 | 0.00 | 0.85 |
| VP2188 | Core genes | folypolyglutamate synthase/dihydrofolate synthase       | VP2188 | 0.00 | 0.95 | 0.00 | 0.00 | 0.00 | 0.95 |
| VP2189 | Core genes | acetyl-CoA carboxylase carboxyltransferase subunit beta | VP2189 | 0.00 | 0.89 | 0.00 | 0.00 | 0.00 | 0.87 |
| VP2190 | Core genes | tRNA pseudouridine synthase A                           | VP2190 | 0.00 | 0.90 | 0.00 | 0.00 | 0.00 | 0.90 |
| VP2193 | Core genes | erythronate-4-phosphate dehydrogenase                   | VP2193 | 0.00 | 0.90 | 0.00 | 0.00 | 0.00 | 0.90 |
| VP2194 | Core genes | 3-oxoacyl-ACP synthase                                  | VP2194 | 0.00 | 0.00 | 0.00 | 0.00 | 0.00 | 0.82 |
| VP2215 | Core genes | cytochrome c-type biogenesis protein                    | VP2215 | 0.00 | 0.83 | 0.00 | 0.00 | 0.00 | 0.84 |
| VP2285 | Core genes | phosphoribosylaminoimidazole synthetase                 | VP2285 | 0.00 | 0.00 | 0.00 | 0.00 | 0.00 | 0.82 |
| VP2319 | Core genes | methionine aminopeptidase                               | VP2319 | 0.00 | 0.00 | 0.00 | 0.00 | 0.00 | 0.85 |
| VP2343 | Core genes | hypothetical protein                                    | VP2343 | 0.00 | 0.90 | 0.00 | 0.00 | 0.00 | 0.90 |



|        |            |                                             |        |      |      |      |      |      |      |
|--------|------------|---------------------------------------------|--------|------|------|------|------|------|------|
| VP2344 | Core genes | hypothetical protein                        | VP2344 | 0.00 | 0.90 | 0.00 | 0.00 | 0.00 | 0.90 |
| VP2352 | Core genes | cell division protein BofA                  | VP2352 | 0.82 | 0.00 | 0.00 | 0.00 | 0.82 | 0.00 |
| VP2360 | Core genes | hypothetical protein                        | VP2360 | 0.82 | 0.00 | 0.00 | 0.00 | 0.00 | 0.00 |
| VP2425 | Core genes | long-chain-fatty-acid-CoA ligase            | VP2425 | 0.00 | 0.85 | 0.00 | 0.00 | 0.00 | 0.85 |
| VP2427 | Core genes | LysR family transcriptional regulator       | VP2427 | 0.00 | 0.00 | 0.00 | 0.00 | 0.00 | 0.84 |
| VP2442 | Core genes | DNA polymerase III subunit psi              | VP2442 | 0.00 | 0.85 | 0.00 | 0.00 | 0.00 | 0.84 |
| VP2445 | Core genes | lipid carrier protein                       | VP2445 | 0.00 | 0.90 | 0.00 | 0.00 | 0.00 | 0.95 |
| VP2448 | Core genes | protease                                    | VP2448 | 0.00 | 0.85 | 0.00 | 0.00 | 0.00 | 0.85 |
| VP2451 | Core genes | lipoprotein NlpI                            | VP2451 | 0.00 | 0.84 | 0.00 | 0.00 | 0.00 | 0.87 |
| VP2452 | Core genes | polynucleotide phosphorylase                | VP2452 | 0.00 | 0.87 | 0.00 | 0.00 | 0.00 | 0.82 |
| VP2456 | Core genes | translation initiation factor IF-2          | VP2456 | 0.00 | 0.85 | 0.00 | 0.00 | 0.00 | 0.83 |
| VP2457 | Core genes | transcription elongation factor NusA        | VP2457 | 0.00 | 0.95 | 0.00 | 0.00 | 0.00 | 0.95 |
| VP2461 | Core genes | phosphoglucosamine mutase                   | VP2461 | 0.00 | 0.85 | 0.00 | 0.00 | 0.00 | 0.85 |
| VP2463 | Core genes | cell division protein FtsH                  | VP2463 | 0.00 | 0.00 | 0.00 | 0.00 | 0.82 | 0.00 |
| VP2480 | Core genes | peptide ABC transporter permease            | VP2480 | 0.00 | 0.84 | 0.00 | 0.00 | 0.00 | 0.83 |
| VP2481 | Core genes | peptide ABC transporter permease            | VP2481 | 0.00 | 0.84 | 0.00 | 0.00 | 0.00 | 0.85 |
| VP2483 | Core genes | peptide ABC transporter ATP-binding protein | VP2483 | 0.00 | 0.83 | 0.00 | 0.00 | 0.00 | 0.86 |
| VP2488 | Core genes | phosphoglucomutase/phosphomanno mutase      | VP2488 | 0.00 | 0.82 | 0.00 | 0.00 | 0.00 | 0.00 |
| VP2490 | Core genes | iron(III) ABC transporter permease          | VP2490 | 0.00 | 0.00 | 0.00 | 0.00 | 0.00 | 0.82 |
| VP2496 | Core genes | hypothetical protein                        | VP2496 | 0.86 | 0.00 | 0.00 | 0.00 | 0.85 | 0.00 |
| VP2564 | Core genes | GTP pyrophosphokinase                       | VP2564 | 0.00 | 0.89 | 0.00 | 0.00 | 0.00 | 0.95 |
| VP2587 | Core genes | 2-octaprenyl-6-methoxyphenyl hydroxylase    | VP2587 | 0.00 | 0.00 | 0.00 | 0.00 | 0.00 | 0.82 |
| VP2591 | Core genes | 5-formyltetrahydrofolate cyclo-ligase       | VP2591 | 0.81 | 0.00 | 0.00 | 0.00 | 0.82 | 0.00 |
| VP2714 | Core genes | class V aminotransferase                    | VP2714 | 0.00 | 0.00 | 0.00 | 0.82 | 0.00 | 0.00 |
| VP2717 | Core genes | B12-dependent methionine synthase           | VP2717 | 0.00 | 0.00 | 0.00 | 0.00 | 0.00 | 0.82 |
| VP2721 | Core genes | sulfite reductase subunit beta              | VP2721 | 0.00 | 0.85 | 0.00 | 0.00 | 0.00 | 0.85 |

|         |            |                                                      |         |      |      |      |      |      |      |
|---------|------------|------------------------------------------------------|---------|------|------|------|------|------|------|
| VP2881  | Core genes | acetyl-CoA carboxylase biotin<br>carboxylase subunit | VP2881  | 0.00 | 0.97 | 0.00 | 0.00 | 0.00 | 0.00 |
| VP2883  | Core genes | ribosomal protein L11<br>methyltransferase           | VP2883  | 0.00 | 0.92 | 0.00 | 0.00 | 0.00 | 0.94 |
| VP2884  | Core genes | NifR3/Smm1 family protein                            | VP2884  | 0.00 | 0.93 | 0.00 | 0.00 | 0.00 | 0.92 |
| VP2886  | Core genes | MFS transporter                                      | VP2886  | 0.00 | 0.92 | 0.00 | 0.00 | 0.00 | 0.93 |
| VP2920  | Core genes | anti-RNA polymerase sigma 70 factor                  | VP2920  | 0.00 | 0.00 | 0.00 | 0.83 | 0.00 | 0.00 |
| VP2956  | Core genes | cell division protein FtsY                           | VP2956  | 0.00 | 0.83 | 0.00 | 0.00 | 0.00 | 0.00 |
| VP2989  | Core genes | uroporphyrinogen-III synthase                        | VP2989  | 0.00 | 0.84 | 0.00 | 0.00 | 0.00 | 0.85 |
| VP2990  | Core genes | uroporphyrin-III C-methyltransferase                 | VP2990  | 0.00 | 0.81 | 0.00 | 0.00 | 0.00 | 0.84 |
| VP3028  | Core genes | camphor resistance protein CrcB                      | VP3028  | 0.00 | 0.82 | 0.00 | 0.00 | 0.00 | 0.00 |
| VPA0001 | Core genes | hypothetical protein                                 | VPA0001 | 0.00 | 0.84 | 0.00 | 0.00 | 0.00 | 0.83 |
| VPA0009 | Core genes | two-component sensor                                 | VPA0009 | 0.00 | 0.86 | 0.00 | 0.00 | 0.00 | 0.85 |
| VPA0045 | Core genes | ada regulatory protein                               | VPA0045 | 0.00 | 0.00 | 0.00 | 0.00 | 0.00 | 0.85 |
| VPA0052 | Core genes | hypothetical protein                                 | VPA0052 | 0.00 | 0.90 | 0.00 | 0.00 | 0.00 | 0.90 |
| VPA0053 | Core genes | transcriptional regulator                            | VPA0053 | 0.00 | 0.95 | 0.00 | 0.00 | 0.00 | 0.95 |
| VPA0054 | Core genes | hypothetical protein                                 | VPA0054 | 0.00 | 0.95 | 0.00 | 0.00 | 0.00 | 0.95 |
| VPA0055 | Core genes | chitinase                                            | VPA0055 | 0.00 | 0.90 | 0.00 | 0.90 | 0.00 | 0.93 |
| VPA0066 | Core genes | hypothetical protein                                 | VPA0066 | 0.00 | 0.84 | 0.00 | 0.00 | 0.00 | 0.85 |
| VPA0067 | Core genes | hypothetical protein                                 | VPA0067 | 0.00 | 0.85 | 0.00 | 0.00 | 0.00 | 0.85 |
| VPA0068 | Core genes | GGDEF family protein                                 | VPA0068 | 0.00 | 0.88 | 0.00 | 0.00 | 0.00 | 0.88 |
| VPA0070 | Core genes | esterase                                             | VPA0070 | 0.00 | 0.88 | 0.00 | 0.00 | 0.00 | 0.90 |
| VPA0071 | Core genes | alcohol dehydrogenase                                | VPA0071 | 0.00 | 0.82 | 0.00 | 0.00 | 0.00 | 0.83 |
| VPA0109 | Core genes | hypothetical protein                                 | VPA0109 | 0.94 | 0.99 | 0.00 | 0.00 | 0.00 | 0.00 |
| VPA0127 | Core genes | cytochrome c-type protein YecK                       | VPA0127 | 0.82 | 0.90 | 0.00 | 0.00 | 0.82 | 0.90 |
| VPA0168 | Core genes | multidrug resistance protein D                       | VPA0168 | 0.00 | 0.82 | 0.00 | 0.00 | 0.00 | 0.00 |
| VPA0175 | Core genes | LysR family transcriptional regulator                | VPA0175 | 0.00 | 0.00 | 0.00 | 0.00 | 0.00 | 0.82 |
| VPA0185 | Core genes | branched chain amino acid<br>transporter             | VPA0185 | 0.00 | 0.90 | 0.00 | 0.00 | 0.00 | 0.90 |
| VPA0186 | Core genes | conotoxin scaffold I                                 | VPA0186 | 0.00 | 0.89 | 0.00 | 0.00 | 0.00 | 0.90 |
| VPA0188 | Core genes | hypothetical protein                                 | VPA0188 | 0.00 | 0.90 | 0.00 | 0.00 | 0.00 | 0.89 |
| VPA0202 | Core genes | GGDEF family protein                                 | VPA0202 | 0.00 | 0.87 | 0.00 | 0.00 | 0.00 | 0.88 |

|         |            |                                               |         |      |      |      |      |      |      |
|---------|------------|-----------------------------------------------|---------|------|------|------|------|------|------|
| VPA0253 | Core genes | transport protein                             | VPA0253 | 0.00 | 0.85 | 0.00 | 0.00 | 0.00 | 0.85 |
| VPA0254 | Core genes | L-serine dehydratase 1                        | VPA0254 | 0.00 | 0.83 | 0.00 | 0.00 | 0.00 | 0.87 |
| VPA0255 | Core genes | hypothetical protein                          | VPA0255 | 0.00 | 0.87 | 0.00 | 0.00 | 0.00 | 0.90 |
| VPA0273 | Core genes | flagellar hook-associated protein             | VPA0273 | 0.00 | 0.00 | 0.91 | 0.00 | 0.00 | 0.00 |
| VPA0318 | Core genes | outer membrane protein OmpV                   | VPA0318 | 0.00 | 0.00 | 0.87 | 0.00 | 0.00 | 0.00 |
| VPA0406 | Core genes | hypothetical protein                          | VPA0406 | 0.00 | 0.85 | 0.00 | 0.00 | 0.00 | 0.85 |
| VPA0467 | Core genes | ABC transporter ATP-binding protein           | VPA0467 | 0.00 | 0.85 | 0.00 | 0.00 | 0.00 | 0.85 |
| VPA0470 | Core genes | multidrug efflux system transmembrane protein | VPA0470 | 0.90 | 0.00 | 0.00 | 0.00 | 0.90 | 0.00 |
| VPA0471 | Core genes | multidrug efflux membrane fusion protein      | VPA0471 | 0.84 | 0.89 | 0.00 | 0.00 | 0.00 | 0.00 |
| VPA0472 | Core genes | long-chain fatty acid transport protein       | VPA0472 | 0.88 | 0.00 | 0.00 | 0.00 | 0.00 | 0.00 |
| VPA0476 | Core genes | hypothetical protein                          | VPA0476 | 0.93 | 0.00 | 0.00 | 0.00 | 0.00 | 0.00 |
| VPA0554 | Core genes | methyl-accepting chemotaxis protein           | VPA0554 | 0.00 | 0.89 | 0.00 | 0.00 | 0.00 | 0.82 |
| VPA0603 | Core genes | NodN-like protein                             | VPA0603 | 0.82 | 0.00 | 0.00 | 0.00 | 0.00 | 0.00 |
| VPA0605 | Core genes | hypothetical protein                          | VPA0605 | 0.00 | 0.85 | 0.00 | 0.00 | 0.00 | 0.00 |
| VPA0606 | Core genes | AraC-type regulatory protein                  | VPA0606 | 0.00 | 0.95 | 0.00 | 0.00 | 0.00 | 0.95 |
| VPA0607 | Core genes | exoribonuclease II                            | VPA0607 | 0.00 | 0.91 | 0.00 | 0.85 | 0.00 | 0.92 |
| VPA0608 | Core genes | ATP-dependent RNA helicase DeaD               | VPA0608 | 0.91 | 0.94 | 0.00 | 0.00 | 0.91 | 0.91 |
| VPA0609 | Core genes | hypothetical protein                          | VPA0609 | 0.82 | 0.93 | 0.00 | 0.00 | 0.00 | 0.91 |
| VPA0613 | Core genes | permease                                      | VPA0613 | 0.00 | 0.86 | 0.00 | 0.00 | 0.00 | 0.87 |
| VPA0614 | Core genes | hypothetical protein                          | VPA0614 | 0.00 | 0.87 | 0.00 | 0.00 | 0.00 | 0.88 |
| VPA0615 | Core genes | hydroxymethylglutaryl-CoA lyase               | VPA0615 | 0.00 | 0.90 | 0.00 | 0.00 | 0.00 | 0.87 |
| VPA0618 | Core genes | acyl-CoA dehydrogenase                        | VPA0618 | 0.00 | 0.85 | 0.00 | 0.00 | 0.00 | 0.85 |
| VPA0668 | Core genes | hypothetical protein                          | VPA0668 | 0.00 | 0.85 | 0.00 | 0.00 | 0.00 | 0.00 |
| VPA0675 | Core genes | sensor protein TorS                           | VPA0675 | 0.00 | 0.00 | 0.00 | 0.00 | 0.82 | 0.00 |
| VPA0677 | Core genes | fatty acid cis/trans isomerase                | VPA0677 | 0.00 | 0.85 | 0.00 | 0.00 | 0.00 | 0.00 |
| VPA0678 | Core genes | hypothetical protein                          | VPA0678 | 0.00 | 0.83 | 0.00 | 0.00 | 0.00 | 0.00 |
| VPA0679 | Core genes | arylsulfatase                                 | VPA0679 | 0.93 | 0.86 | 0.91 | 0.89 | 0.93 | 0.87 |
| VPA0680 | Core genes | arylsulfatase                                 | VPA0680 | 0.91 | 0.00 | 0.00 | 0.94 | 0.94 | 0.00 |



|         |            |                                          |         |      |      |      |      |      |      |
|---------|------------|------------------------------------------|---------|------|------|------|------|------|------|
| VPA1219 | Core genes | transcriptional regulator                | VPA1219 | 0.00 | 0.00 | 0.00 | 0.00 | 0.00 | 0.85 |
| VPA1404 | Core genes | hypothetical protein                     | VPA1404 | 0.00 | 0.00 | 0.00 | 0.00 | 0.00 | 0.85 |
| VPA1406 | Core genes | exopolysaccharide biosynthesis protein   | VPA1406 | 0.00 | 0.82 | 0.00 | 0.00 | 0.00 | 0.00 |
| VPA1407 | Core genes | hypothetical protein                     | VPA1407 | 0.00 | 0.85 | 0.00 | 0.00 | 0.00 | 0.85 |
| VPA1412 | Core genes | polysaccharide biosynthesis-like protein | VPA1412 | 0.00 | 0.90 | 0.00 | 0.83 | 0.00 | 0.86 |
| VPA1413 | Core genes | hypothetical protein                     | VPA1413 | 0.00 | 0.85 | 0.00 | 0.00 | 0.00 | 0.85 |
| VPA1449 | Core genes | methyl-accepting chemotaxis protein      | VPA1449 | 0.00 | 0.83 | 0.00 | 0.00 | 0.00 | 0.85 |
| VPA1511 | Core genes | sensory box/GGDEF family protein SrcC    | VPA1511 | 0.00 | 0.00 | 0.00 | 0.00 | 0.00 | 0.84 |
| VPA1557 | Core genes | chemotaxis LafU protein                  | VPA1557 | 0.00 | 0.83 | 0.00 | 0.00 | 0.00 | 0.00 |
